# Supplementary material
Source: PubMed Central journal article supplement (PMC2664034)
Supplement: 0808468106_Appendix_PDF.pdf [file 0808468106_Appendix_PDF.pdf]

\SUPPORTING APPENDIX FOR

ECOMORPHOLOGICAL SELECTIVITY AMONG MARINE  
TELEOST FISHES DURING THE END-CRETACEOUS  
EXTINCTION

Matt Friedman

Committee on Evolutionary Biology, University of Chicago, 1025 E. 57<sup>th</sup> St., Chicago,  
IL 60637

and

Department of Geology, Field Museum, 1400 S Lake Shore Dr., Chicago, IL 60605

<matff@uchicago.edu>

## **Table of contents.**

|                                                                  |    |
|------------------------------------------------------------------|----|
| I. Dataset assembly procedures.                                  | 3  |
| II. Groups of fishes analyzed.                                   | 6  |
| III. Maastrichtian fishes (observed plus implied): trait values. | 47 |
| Supporting table 1                                               | 47 |
| IV. Complete logistic regression results.                        | 50 |
| Supporting table 2                                               | 50 |
| Supporting table 3                                               | 51 |
| Supporting table 4                                               | 52 |
| V. Global topology for independent contrasts analysis.           | 53 |
| Supporting figure 1                                              | 54 |
| VI. Phylogenetically independent contrasts: values.              | 55 |
| Supporting table 5                                               | 55 |
| Supporting table 6                                               | 56 |
| Supporting table 7                                               | 57 |
| Supporting table 8                                               | 59 |
| VII. Stratigraphic occurrences of extinction victims.            | 61 |
| Supporting figure 2                                              | 62 |
| Supporting figure 3                                              | 63 |
| Supporting figure 4                                              | 64 |
| VIII. Dietary evidence for select extinction victims.            | 65 |
| Supporting table 9                                               | 65 |
| IX. References.                                                  | 66 |

## **I. Dataset assembly procedures.**

### *Stratigraphic conventions.*

Taxon occurrences are placed at the top of the interval in which they occur. In the case of taxa ranging through multiple stages, the terminal is placed in the stage from which the measured fossil example(s) derive. Fossil localities of uncertain dating (i.e., those whose dating is given by more than one stage) are binned in the geologically youngest stage with which they are associated. Branching between sister clades is placed 1 Ma below the first occurrence of the group with the oldest fossil exemplar included in the study. Throughout, dates of stage boundaries follow those in Gradstein *et al.* (2004).

### *Phylogenetic conventions.*

This study concerns extinction selectivity in marine teleosts only. Implied boundary crossers are only assumed to be marine if their closest Mesozoic relative is known from fossils preserved in marine sediments. The taxonomic scope of this analysis is total-group Teleostei. Therefore all fossil groups more closely related to living teleosts (the crown) than to any other extant group are considered here, even though some essentialist, apomorphy-based definitions of Teleostei exclude them from that group (e.g., Arratia 1997).

Genera in the dataset were divided into 23 (mostly ordinal- or sub-ordinal) clades for further analysis; these are reviewed in full in part II of this Supporting Appendix (pg. 7). Of these groups, 18 survived into the Cenozoic and required phylogenetic topologies to estimate the characteristics of implied lineages crossing the Cretaceous-Paleogene

boundary. Three *incertae sedis* genera (†*Nardorex*, †*Apateodus*, †*Chanoides*) were considered independently, as was †Dercetidae, which is of uncertain placement within Aulopiformes. Phylogenetic hypotheses for clades were derived from published analyses, and were used in conjunction with models of character evolution to estimate trait values for lineages inferred to have survived the extinction.

Interrelationships within and among the clades discussed in the previous section are based on published systematic analyses. In cases in which there is either extreme conflict between solutions or no formal hypothesis of interrelationships, groups are collapsed into an unresolved polytomy. An exception to this general rule applies to clades with multiple post-Mesozoic fossil members for which no systematic solution is available. Since there is no formal hypothesis of interrelationships, the number of boundary-crossing lineages cannot be rigorously assessed. In such cases, all post-Mesozoic taxa are placed in an unresolved clade, and this group then placed in a polytomy with all older members. This procedure therefore conservatively and consistently infers only one boundary crossing lineage.

*Morphometric conventions.*

*Jaw mechanics.* The parameter considered here is jaw closing mechanical advantage, a unitless value that consists of the ratio of the jaw closing inlever to the outlever (Westneat 2004). Both of these linear measurements share one endpoint in common: the point at which the lower jaw articulates with the quadrate. The distance between this point and the tip of the jaw or the distalmost tooth (the larger of these two values is used in this analysis) is the outlever arm. The inlever arm is measured as the distance between the mandibular articulation and the insertion area of jaw closing

muscles, which is marked by an osteological correlate in neopterygian fishes (the coronoid process). Relative measurements were either taken as direct measurements from fossil material, or digitally from specimen photographs or illustrations.

*Body size.* Fossil fishes are typically preserved as lateral compressions. Since length measurements alone ignore considerable variation in body depth among teleost fishes (e.g., an eel and angelfish of identical length have drastically different body sizes), body size is therefore measured as lateral area in this study. Size measurements for all fishes considered (i.e., both those represented by fossil and Recent materials) were made by calculating the area enclosed by an outline of the body, excluding those parts of the median fins supported only by lepidotrichia. All measurements were made using the program Scion Image for Windows. Values for extinct genera were taken from the largest fossil specimen reported or observed, while sizes for Recent taxa were taken from the largest examples preserved in the collection of the Division of Fishes, Department of Zoology, Field Museum. In the case of alcohol-preserved Recent material, MA values were taken from radiographs.

The largest examples of some fossil taxa consist of incomplete remains. In such cases, smaller, complete material was scaled isometrically to match elements of the largest specimen. Measurements were then taken from this rescaled example. A similar approach was used to infer body size in the case of fossil taxa where no examples were complete. In this case, a phylogenetically proximal taxon (i.e., sister genus) was scaled isometrically to match the dimensions of its incomplete relative. As in the previous example, measurements were taken from this rescaled specimen.

## II. Groups of fishes analyzed.

†*Pycnodontiformes*.

*Summary.* †Pycnodonts are a diverse clade of stem teleosts (Gardiner *et al.* 1996, Nursall 1996) that range in age from Triassic to Eocene. Most pycnodonts are deep-bodied fishes with crushing dentitions, although some Cretaceous forms (†*Gabrielichthys*, †*Coccodus*, †*Trewavasiasia*, †*Ichthyoceros*) are characterized by highly divergent body forms. Here the analysis of Poyato-Ariza and Wenz (2002) is used as the phylogenetic framework for †pycnodonts; other published cladistic hypotheses of †pycnodont interrelationships (Poyato-Ariza 2003, Kriwet 2005) are based on analyses of the data matrix assembled by Poyato-Ariza (2002) either in part or in full. This solution implies that no fewer than five lineages of †pycnodonts crossed the Cretaceous/Paleogene boundary (†*Anomoeodus*, †*Pycnodus* + †*Oropycnodus* lineage, †*Nursallia veronae* lineage, †*Abdobalistum* lineage, †*Palaeobalistum* lineage).

*Topology used in analyses (Newick format; branch lengths given in Ma).*

1 †*Stemmatodus*,  
2 †*Anomoeodus*,  
3 †*Ocloedus*,  
4 †*Tepexichthys*,  
5 †*Neoproscinetes*,  
6 †*Iemanja*,  
7 †*Coelodus*,  
8 †*Oropycnodus*,  
9 †*Pycnodus*,  
10 †*Nursallia*,  
11 †?*Nursallia gutturosum*,  
12 †*Abdobalistum*,  
13 †?*Nursallia goedeli*,  
14 †*Palaeobalistum*;

(1:12.4,2:12.4,3:1.0,(4:2.0,(5:1.0,6:1.0,7:11.3,((8:1.0,9:14.1):35.8,(10:48.9,(11:3.0,(12:46.9,(13:1.0,14:45.9):1.0):1.0):1.0):1.0):2.1):1.0):35.8):1.0

†*Pachycormidae*.

*Summary.* †Pachycormids are a group of stem teleosts, convergent upon modern scombroid and xiphioid acanthomorphs. Two †pachycormids persist in the fossil record until the end of the Cretaceous: †*Protosphyraena* and †*Ichthyriapus*, which is conventionally placed in †*Protosphyraena* (†‘*P.*’ *gladius*) but seems not to belong in that genus (Stewart 1988; Lambers 1992). †*Protosphyraena* ranges from the Cenomanian of Cinto-Euganeo, Italy (Sorbini 1976) to the Maastrichtian of California, USA (David 1946) and Belgium (Dollo 1893), with numerous intervening occurrences (Lambers 1992). †*Ichthyriapus* is known only from North America, where it ranges from the Coniacian to Maastrichtian (Stewart 1988; Parris *et al.* 2007); the anatomy of this genus is too incompletely known at present to include in this analysis.

†*Aspidorhynchidae*.

*Summary.* †Aspidorhynchids are a clade of gar-like stem teleosts (Patterson 1977) known from the Jurassic and Cretaceous. This group includes four genera: †*Vinctifer*, †*Belonostomus*, †*Aspidorhynchus*, and †*Richmondichthys* (Brito 1997, Bartholomai 2004). †*Belonostomus*, which ranges from the Kimmeridgian of England and France (Brito 1997, Dineley and Metcalf 1999) to the Campanian-Maastrichtian of Nardò, Italy and the Maastrichtian chalks of Belgium and the Netherlands (Taverne 1998b, pers. obs.), is the latest occurring taxon in this clade. †*Belonostomus* is also present in Maastrichtian freshwater deposits of the western United States (Bryant 1989). Following Cavin (2001a), I consider the presymphsial bone of *Belonostomus* reported from late Paleocene of North Dakota (Bryant 1987) to be reworked from older (*i.e.*, Cretaceous) strata.



†*Ichthyodeciformes*.

*Summary.* †Ichthyodectiforms are radiation of stem teleosts (Patterson and Rosen 1977) known exclusively from Mesozoic deposits. Three ichthyodectiform genera make their last appearance in the Maastrichtian: †*Saurodon*, from Nardò, Italy (Taverne and Bronzi 1999) the Navesink Formation of New Jersey, USA (Bardack and Sprinkle 1969), and the Moreno Formation of California, USA (Russell 1988); †*Saurocephalus*, from the chalks of Maastricht, the Netherlands (Bardack and Sprinkle 1969); †*Xiphactinus*, from the Navesink Formation of New Jersey, USA (Gallagher *et al.* 1986, Gallagher 1993, Schwimmer *et al.* 1997). David (1946) attributed a scale fragment from the Maastrichtian Panoche Formation of California, USA to †*Ichthyodectes*, did but not figure this specimen. At present, I consider that there is inadequate evidence that †*Ichthyodectes* persisted until the Maastrichtian.

There are persistent references in the literature to post-Cretaceous fossils of †ichthyodectiforms, but all of these accounts concern specimens of highly uncertain provenance. †*Prymnetes* is known from a single specimen from near Tuxtla, Chiapas state, Mexico. No stratigraphic position for this specimen was given by Cope (1871), but Frickhinger (1995; this volume mistakenly lists the genus as “*Prymnites*”) indicated it is Tertiary in age. This might be traced to a personal communication from David Dunkle in Bardack (1963) that †*Prymnetes* might be Eocene in age, but the evidence given for a Cretaceous age in that same paper is more compelling. In the most recent review of Mexican fossil fishes, Alvarado-Ortega *et al.* (2006) suggested †*Prymnetes* might derive from Lower Cretaceous deposits. Maisey (1996: 171) alluded to Eocene

ichthyodectiform remains from Brazil, but these specimens have never been described or figured, and their provenance remains undocumented (JG Maisey, pers. comm., 2007).

For the independent contrasts analysis, the following branching pattern among ichthyodectiforms is used: [ $\dagger$ *Xiphactinus* [ $\dagger$ *Saurodon* ,  $\dagger$ *Saurocephalus*]] (Stewart 1999).

*Osteoglossomorpha.*

*Summary.* Osteoglossomorphs are the extant sister-group of all remaining living teleosts, and first appear in the fossil record in Lower Cretaceous strata (Patterson 1993b). A diverse set of marine osteoglossomorphs are known from lower Paleogene deposits, most notably the Danatinsk Suite (Thatnetian, Turkmenistan; Danil'chenko 1968), London Clay (Ypresian, UK; Casier 1966), Fur Formation (Ypresian, Denmark: Bonde 1997, 2008), and Bolca (Ypresian, Italy: Taverne 1998a), but all convincing records of Cretaceous osteoglossomorphs are from freshwater deposits. For this reason, this clade has not been included in the present analysis.

†*Crossognathidae*.

*Summary.* †Crossognathids are a group of Mesozoic teleosts of uncertain phylogenetic placement. Rosen and Patterson (1977) suggested a basal, but *incertae sedis*, position. Taverne (1988) associated this group with †pachyrhizodontoids, uniting the two clades within the †Crossognathiformes, which he placed within the teleost crown. Cavin (2001b) has argued that †crossognathids and †pachyrhizodontoids are not closely related. He placed †pachyrhizodontoids within Elopocephala above elopomorphs, and †crossognathids outside the elopocephalan radiation. †Crossognathids share some derived features with †varasichthyids (Cavin 2001b, Cavin and Grigorescu 2005), a clade of stem teleosts (Arratia 1997), indicating that they might fall outside the teleost crown, as first proposed by Rosen and Patterson (1977).

The latest surviving †crossognathid is †*Apsopelix*, which last occurs in the Campanian-Maastrichtian Mason River Formation of Canada and the Maastrichtian Fox Hills Sandstone of Colorado (Dunkle 1960, Russell 1988).

*Elopomorpha.*

Elopomorph phylogeny is largely adapted from Forey *et al.* (1996), Forey (1973), and Belouze (2002). Among non-anguilliform elopomorphs, the following familial assignments for fossil taxa are used here, where families concerned are treated as total-groups: Elopidae: †*Ichthyemidion* (Berriasian-Valanginian; Poyato-Ariza 1995), †*Davichthys* (Cenomanian-Santonian; Forey 1973), †*Ctenodentelops* (Cenomanian; Forey *et al.* 2003); Megalopidae: †*Arratiaelops* (Berriasian-Valanginian; Taverne 1999a), †*Sedenhorstia* (Cenomanian-Campanian; Forey 1973), †*Promegalops* (Ypresian; Forey 1973), †*Protarpon* (Ypresian; Forey 1973); Albulidae: †*Lebonichthys* (Cenomanian-Santonian; Forey 1973) (the various fossil dentitions and highly incomplete specimens from Cretaceous strata attributed to *Albula* are not considered here, although many of these are undoubtedly albulids), †*Deltaichthys* (uncertain, but probably Turonian; Fielitz and Bardack 1992); Pterothrissidae: †*Hajulia* (Cenomanian; Forey 1973), *Isteus* (Santonian-Recent; Forey 1973, here I consider the genus *Pterothrissus* a junior synonym of *Isteus*, cf. Robins 1989); Halosauridae: †*Echidnocephalus* (Campanian; Siegfried, 1954); †*Laytonia* (Messinian; David 1943, 1946). †*Anaethalion* has been associated with elopids (Forey *et al.* 1996), but I regard the placement of this taxon as too uncertain to incorporate it into the present analysis. †*Brannerion* (Albian; Blum 1991), †*Parelops* (Albian; Maisey and Blum 1991), †*Baugeichthys* (Hauterivian; Fillieul 2000) and †*Osmeroides* (Albian-Coniacian; Forey 1973) are considered stem albuloids (*i.e.*, branching below the split between albulids and pterothrissids). Since there is no clear evidence that notocanthids and halosaurids (inclusive of the fossils attributed to them) are

reciprocally monophyletic, I conservatively consider only a single notocanthiform lineage crossing the K-P boundary.

Several eel body fossils are known from Cretaceous deposits, and the bulk of these appear to be stem anguilliforms (Belouze 2002). There are two body-fossil records of crown-group eels from Cretaceous deposits. The first of these is the Cenomanian †*Enchelion*, which was identified as a stem-group saccopharyngoid by Patterson (1993b), an interpretation later corroborated by the cladistic analysis presented by Belouze (2002). The second example is the Campanian-Maastrichtian genus †*Nardoechelys* was described by Taverne (2002b) as an ophichthid. This latter taxon is incompletely known, and excluded from the present analysis. The apical placement of saccopharyngoids within anguilliform phylogeny implies many eel lineages crossed the K-P boundary.

*Topology used in analyses (Newick format; branch lengths given in Ma).*

```
1 †Ichthyemidion,  
2 †Davichthys,  
3 †Ctenodentelops,  
4 Elops,  
5 †Arratiaelops,  
6 †Sedenhorstia,  
7 †Protarpon,  
8 †Promegalops,  
9 †Lebonichthys,  
10 †Brannerion,  
11 †Parelops,  
12 †Baugeichthys,  
13 †Osmeroides,  
14 †Deltaichthys,  
15 Albula,  
16 †Isteus,  
17 †Echidnocephalus,  
18 †Laytonia,  
19 †Luenchelys,  
20 †Urenchelys,  
21 †Hayenchelys,  
22 †Anguillavus,  
23 †Abisaadia,  
24 †Libanenchelys,  
25 †Mylomyrus,  
26 Anguilla,  
27 †Eoanguilla,
```



†*Tselfatiiformes*.

*Summary.* †Tselfatiiforms are an extinct radiation of crown-group teleosts that include three nominal families: †Protobramidae, †Eoplethodidae and †Plethodidae (Taverne and Gayet 2004, 2005). †Protobramids are relatively small and deep-bodied, and superficially convergent upon some early acanthomorphs. †Plethodids are the most taxonomically diverse group of †tselfatiiforms, and are typically large with thunniform body profiles, consistent with an epipelagic habit.

The youngest †tselfatiiform fossils are fragmentary remains from the Maastrichtian Ghareb Formation of Israel, which have been identified by Chalifa and Lewy (1992) as similar to †*Bananogmius crieleyi* from the Campanian of Alabama, USA (Applegate 1970). This species has been reassigned to the genus †*Pentanogmius* by Taverne (2000), which is known from articulated material from the Niobrara chinks of the western USA (Taverne 2004a). Remains attributed to a tselfatiiform similar to †*Bananogmius* are also reported from the very base of the Danian Hornerstown Formation of New Jersey, USA (Gallagher 2003). This material derives from a basal lag above a non-conformable contact with underlying Maastrichtian formations (Tinton and New Egypt formations; Landman *et al.* 2004). This concentrated fossil bed yields specimens with a strong Mesozoic character, indicating that these materials are reworked from underlying deposits (Landman *et al.* 2004).



## *Clupeomorpha.*

Clupeomorphs include living fishes commonly referred to as herrings. The most comprehensive systematic review of this group based on morphology is Grande (1985), and this has recently been supplemented by molecular analyses based on complete mitochondrial genomes (Lavoué *et al.* 2007). Molecular studies agree with some aspects of the morphological solution, and help to clarify features of clupeomorph phylogeny not apparent from anatomical analyses. Both sets agree that Denticipidae is the living sister group of Clupeoidei, and that Engraulidae and Denticipitidae fall outside of Clupeidae. Molecular analyses indicate that engraulids and denticipitids are successively more distal outgroups to clupeids. The non-monophyly of most clupeid subfamilies, suspected on the basis of morphological investigation (Grande 1985), is corroborated by molecular analyses. Only Pellonulinae form a clade. Clupeinae and Alosinae are polyphyletic, but Dorosomatinae and Dussumeriinae are paraphyletic, the latter because it includes the monogeneric Chirocentridae (Lavoué *et al.* 2007).

Grande (1985) identified a clade of Cretaceous fishes, †Paraclupeidae (= his †Ellimmichthyidae), as stem-group clupeomorphs. Most Cretaceous clupeomorphs can be assigned to this extinct radiation, and include: †*Armigatus* (Cenomanian; Forey *et al.* 2003), †*Sorbiniclupea* (Cenomanian; Bannikov and Bacchia 2000), †*Triplomystus* (Albian-Cenomanian; Forey *et al.* 2003, Alvarado-Ortega and Ovalles-Damían 2008), †*Ellimma* (Aptian-Albian; Chang and Maisey 2003), †*Paraclupea* (Lower Cretaceous; Chang and Grande 1997) and †*Ellimmichthys* (Barremian; Grande 1982). †*Diplomystus*, which first appears in marine Cenomanian deposits, is the only †paraclupeid to persist

into the Eocene, with the youngest specimens of this genus known from China and the western USA (Grande 1982, 1985). Chang and Maisey (2003) have presented a hypothesis of †paraclupeid interrelationships, but this solution included only a limited taxon sample. For this reason, I have collapsed all members of this clade into an unresolved polytomy, but accept their interpretation of †*Armigatus* as a member of this clade (contra Grande 1985, Forey *et al.* 2003).

Three clupeomorphs are known from the Cretaceous (Campanian-Maastrichtian) of Nardò, Italy: †*Italoclupea* (Taverne 2007), †*Pugliaclupea* (Taverne 2004c) and †*Nardoclupea* (Taverne 2002). All of these taxa fall within the crown, and have been attributed to Clupeidae. The placement of †*Pugliaclupea* among clupeids is uncertain, but Taverne (2002a) has argued that †*Nardoclupea* is a member of Dussumieriinae and that †*Italoclupea* (2007) is a member of 'Clupinae'. Multiple post-Cretaceous exemplars represent these subfamilies in this analysis.

The presence of clupeids in the Cretaceous implies that at least four more lineages of clupeomorphs can be drawn into the Mesozoic based on current molecular phylogenies (Lavoué *et al.* 2007): Pristigasteridae, Denticepitidae, Engraulidae and Sundasalangidae. Cenozoic fossil exemplars include the Santonian-Thanetian (Gayet and Meunier 1998) †*Gasteroclupea* (Pristigasteridae), the Lutetian †*Palaeodenticeps* (Denticepitidae) and the Messinian †*Engraulis tethensis* (Engraulidae). Sundasalangidae, which are only known from freshwater environments today, are not included here.

*Topology used in analyses (Newick format; branch lengths given in Ma).*

```
1 †Sorbinichthys,  
2 †Triplomystus,  
3 †Ellimma,  
4 †Ellimmichthys,  
5 †Armigatus,  
6 †Diplomystus,
```

- 7 †*Palaeodenticeps*,
- 8 *Engraulis*,
- 9 †*Nardoclupea*,
- 10 *Etrumeus*,
- 11 *Spratelloides*,
- 12 †*Sahelinia*,
- 13 †*Pugliaclupea*,
- 14 †*Italoclupea*,
- 15 *Clupea*,
- 16 †*Knightia*,
- 17 †*Gosiutichthys*,
- 18 *Alosa*,
- 19 †*Gasteroclupea*,
- 20 †*Xyne*;

((1:32.5,2:32.5,3:14.0,4:1.0,5:32.5,6:77.4):1.0,(7:30.1,(8:64.168,(19:6.8,(((11:1.0,12:1.0,10:1.0):60.168,9:1.0):1.0,13:2.0,14:2.0,(15:8.2,16:16.4,17:8.2,18:51.468):10.7):1.0):1.0):1.0):56.5);

*Gonorhynchiformes.*

Gonorhynchiforms are a major group within Ostariophysii, and comprises two suborders: Chanoidei and Gonorhynchoidei. *Sorbininardus*, from Nardò, appears to branch from the gonorhynchiform stem, prior to the split between chanoids and gonorhynchoids (Taverne 1999b). The milkfish *Chanos* is the only extant chanoid. In addition to this Recent exemplar, there are numerous fossil members of this group which are considered in this analysis. These are, in increasing proximity to the crown: †*Aethalionopsis* (Berriasian), [†*Rubiesichthys* + †*Gordichthys*] (Berriasian-Valanginian), †*Parachanos* (Aptian), †*Dastilbe* (Aptian-Albian) and †*Tharrias* (Aptian-Albian) (Grande and Poyato-Ariza 1999). Extant gonorhynchoid diversity is greater, and includes the marine *Gonorhynchus* and the freshwater kneriids. Several fossil gonorhynchoids are included here in addition to *Gonorhynchus*. These include: †*Apulichthys* (Campanian-Maastrichtian; Taverne 1997); †*Judeichthys* (Cenomanian; Gayet 1985a); †*Charitosomus* (Santonian-Campanian; Gayet 1993); †*Haekliosomus* (Cenomanian; Gayet 1993); †*Ramallichthys* (Cenomanian; Gayet 1993); †*Charitopsis* (Cenomanian; Gayet 1993); †*Lecceichthys* (Campanian-Maastrichtian; Taverne 1998c); †*Notogoneus* (Maastrichtian-lower Miocene; this taxon is known only from freshwater deposits, and is therefore not placed within the pool of survivors; Grande and Grande 1999). Relationships among gonorhynchoids are adapted from Grande and Poyato-Ariza (1999). †*Apulichthys* is placed as sister to all remaining gonorhynchoids (Taverne 1997), and †*Lecceichthys* is the sister to [†*Notogoneus* + *Gonorhynchus*] (Taverne 1998c).

*Topology used in analyses (Newick format; branch lengths given in Ma).*

- 1 †*Sorbininardus*,
- 2 †*Aethalionopsis*,
- 3 †*Dastilbe*,

- 4 †*Parachanos*,
- 5 †*Tharrias*,
- 6 *Chanos*,
- 7 †*Gordichthys*,
- 8 †*Rubiesichthys*,
- 9 †*Apulichthys*,
- 10 †*Judeichthys*,
- 11 †*Charitosomus*,
- 12 †*Hakeliosomus*,
- 13 †*Ramallichthys*,
- 14 †*Charitopsis*,
- 15 †*Lecceichthys*,
- 16 †*Notogoneus*,
- 17 *Gonorhynchus*;

(1:77.7,((2:1.0,((7:1.0,8:1.0):1.0,(3:13.4,4:1.0,(5:1.0,6:100.6):12.4):25.4):2.8):1.0,(9:30.0,(10:1.0,11:11.0,12:1.0,13:1.0,14:1.0,(15:2.0,(16:17.9,17:66.5):1.0):27.0):1.0):46.7):1.0);

## *Otophysi.*

Otophysans are a spectacularly diverse radiation of primarily freshwater fishes, and include cypriniforms, characiforms and siluriforms. Of these, only characiforms are represented by articulated remains from Mesozoic marine deposits. Gayet (1985a) has claimed that the diminutive †*Salminops*, from the Cenomanian of Portugal, is the oldest characiform, but this interpretation has been met with considerable skepticism (Fink and Fink 1996). This taxon is not included here. Apart from this problematic genus, there is only one plausible Cretaceous characiform represented by articulated material: †*Sorbinicharax*, from the Campanian-Maastrichtian of Nardò, Italy (Taverne 2003b). In addition to this plesiomorphic characiform, one problematic otophysan is also included here: the Cretaceous-Eocene †*Chanoides* (Patterson 1984, Taverne 2005a). It is uncertain whether this genus falls within the otophysan crown or branches from the stem (Patterson 1984); it is placed as the sister group of †*Sorbinicharax* in comparative analyses.

†*Pachyrhizodontoidei*.

*Summary.* †Pachyrhizodontoids are an extinct group of predatory fishes that are known from Cretaceous and Paleogene strata. The relationships and limits of †pachyrhizodontoids given here are those proposed by Cavin (2001b). †Pachyrhizodontoids have been divided into two families: †Pachyrhizodontidae, containing the genera †*Rhacolepis* (Aptian-Albian), †*Goulmimichthys* (Turonian; Cavin 2001b), and †*Pachyrhizodus* (Albian-Maastrichtian; Forey 1977), and †Notelopidae, which contains †*Notelops* (Aptian-Albian). These two families are placed in a polytomy along with †*Elopopsis* (Cenomanian-Turonian; Forey 1977, Taverne 1993) by Cavin (2001b). Two additional genera have been placed within †Pachyrhizodontoidei, as successive sister-groups to the †pachyrhizodontid/†notelopid/†*Elopopsis* clade: †*Tingitanichthys* (Cenomanian; Taverne 1996) and †*Platinx*. Of these taxa, all are confined to the Cretaceous with the exception of †*Platinx*, which is known from the Paleocene (Thanetian) of Turkmenistan (Danil’chenko 1968; †*P. cognitus*) and the Eocene (Ypresian) of Bolca (Taverne 1980; †*P. macropterus*). Incomplete material labeled as †*Platinx*, from the Eocene of Syria, is housed at MNHN, Paris (K 1258). †*Pachyrhizodus* is the latest surviving †pachyrhizodontoid excluding †*Platinx*, with its final occurrences in the Campanian-Maastrichtian of New Zealand (Wiffen 1983) and Maastrichtian of the Netherlands (e.g., BMNH 42978a) and California, USA (David 1946).

*Topology used in analyses (Newick format; branch lengths given in Ma).*

- 1 †*Rhacolepis*,
- 2 †*Goulmimichthys*,
- 3 †*Pachyrhizodus*,

4 †*Notelops*,  
5 †*Tingitanichthys*,  
6 †*Patinx*,  
7 †*Elopopsis*;

(6:54.0,(5:8.1,(1:1.0,2:11.3,3:17.1,4:1.0,7:7.1):1.0):1.0);



*'Protoacanthopterygii'*.

There is considerable disagreement surrounding the interrelationships of the various extant 'protoacanthopterygian' groups (salmoniforms *sensu stricto*, argentoids, osmeroids, alepocephaloids, esociforms; Ishiguro *et al.* 2003 and references therein), although it is clear that these radiations do not form a clade to the exclusion of neoteleosts. The absence of a clear phylogenetic framework for living taxa makes it exceptionally difficult to place fossil 'protoacanthopterygians'. Most Mesozoic 'protoacanthopterygians' have been attributed to 'salmoniformes' in the broad sense (e.g, Patterson 1970, Taverne 1992), a placement so imprecise that it differs little from assignment to 'Protoacanthopterygii' *incertae sedis*. Two Cretaceous fishes historically associated with stomiiforms have been reinterpreted as 'salmoniforms' *sensu lato*: †*Spaniodon* (said to have osmeroid affinities; Taverne and Filleul 2003) and †*Paravinciguerria* (said to be salmonoid or salmoniform *sensu stricto*; Taverne 1994). Support for these interpretations is weak. In this analysis I maintain the 'traditional' placement of †*Paravinciguerria* as a stomiiform, and regard †*Spaniodon* and the very similar †*Protostomias* and †*Pronotocanthus* (both of which have been interpreted as stomiiforms by Taverne 1991), as 'Protoacanthopterygii' *incertae sedis*.

The Cretaceous 'protoacanthopterygians' that can be identified most precisely derive from freshwater deposits. These include esociforms from North America (Wilson *et al.* 1992) and a galaxiid from South Africa (Anderson 1998), although the identification of the latter is disputed (Lee *et al.* 2007). In the absence of compelling

evidence supporting the placement of any of the Cretaceous marine ‘salmoniforms’, I have not considered any ‘protoacanthopterygian’ groups in this analysis.

*Stomiiformes.*

Many Cretaceous fishes have been associated with Stomiiformes. Ignoring the tenuous link between stomiiforms and †enchodontids (now considered aulopiforms), which was a fashionable arrangement in the early 20<sup>th</sup> century (Regan 1911, Gregory and Conrad 1936), these taxa include: †*Tomognathus*, †*Idrissia*, †*Protostomias*, †*Pronotocanthus*, and †*Paravinciguerrria*. In most cases, the systematic interpretation of these taxa appears to have been developed on the basis of a morphological gestalt rather than distinctive stomiiform characters. Forey and Patterson (2006) have since shown that †*Tomognathus* is an apomorphic amioid halecomorph. Taverne (1991) has revived the notion, earlier rejected by Fink (1985), that †*Protostomias* and †*Pronotocanthus* are stomiiforms. I am unconvinced by his arguments for stomiiform affinities, but am impressed by a series of close correspondences in cranial anatomy between these fossil genera and †*Spaniodon*, a Cretaceous ‘protoacanthopterygian’ (Taverne and Filleul 2003). Particularly striking is the anatomy of the lower jaw, which is stout in all three genera, bearing an enormous coronoid process plus three enlarged fangs. The putative stomiiform †*Idrissia* supposedly ranges in age from early Late Cretaceous (Cenomanian) to Late Oligocene (Rupelian); it is doubtful whether these materials are congeneric or if even they belong to a stomiiform (Weitzman 1967). †*Paravinciguerrria* is the sole putative Cretaceous stomiiform retained here; it is joined by a diversity of Cenozoic representatives from three crown-group families (Phosichthyidae, Gonostomidae, Sternoptychidae) ranging in age from Eocene to Miocene. The interrelationships of fossil stomiiforms follow Prokofiev (2005), with †*Paravinciguerrria* placed on the stem.

*Topology used in analyses (Newick format; branch lengths given in Ma).*

- 1 †*Paravinciguerrria*,
- 2 †*Sytchevskia*,
- 3 †*Scopeloides*,
- 4 †*Primaevistomias*,
- 5 †*Eovinciguerrria*,
- 6 *Vinciguerrria*,
- 7 †*Discosternon*,
- 8 *Polyipnus*,
- 9 *Polyipnoides*,
- 10 †*Archaeolicus*,
- 11 *Argyropelecus*,
- 12 †*Horbatshia*;

(( (2:1.0,5:13.0,6:29.792):2.0,((4:1.0,3:13.0):1.0,(7:29.792,8:13.0,9:1.0,10:13.0,11:13.0,12:13.0):1.0):1.0):51.1,1:1.0):1.0;

### *Aulopiformes.*

Aulopiforms include four major extant radiations: synodontoids, chloropthamoids, alepisauroids, and giganturoids. All but the last of these are represented by body fossil remains. Many of the the diverse Cretaceous aulopiform groups (e.g. †dercetids) are of unclear relationship to living clades and are best considered *incertae sedis*. I have therefore broken this discussion into four sections: the first three review synodontoids, chloropthalmoids and alepisauroids, while the fourth discusses *incertae sedis* aulopiforms (which are often associated with alepisauroids) that are treated independently of these other groups here.

### *Synodontoidei.*

Cretaceous synodontoids include the Campanian †*Nematonotus*, the Turonian †*Volcichthys* and the Campanian †*Sardinius* (Rosen 1973). Patterson (1993b) attributed the last genus to Myctophidae, but the resemblances here are only superficial. Cenozoic synodontoids included in this study are the London Clay (Ypresian) genera †*Agrillichthys* (Synodontidae), †*Aulopopsis* and †*Labrophagus* (both Aulopodidae), and *Synodus* from the Messinian of Algeria.

*Topology used in analyses (Newick format; branch lengths given in Ma).*

1 †*Nematonotus*,  
2 †*Volcichthys*,  
3 †*Sardinius*,  
4 †*Agrillichthys*,  
5 *Synodus*,  
6 †*Aulopopsis*,  
7 †*Labrophagus*;

(1:1.0,2:5.2,3:23.9,((4:1.0,5:44.268):1.0,(6:1.0,7:1.0):1.0):43.9):1.0;

*Chlorophthalmoidei.*

Recognized Mesozoic chlorophthalmoids are limited to the Cenomanian-Santonian genus †*Acrognathus* (Patterson 1993b). There are no Cenozoic body fossils of chlorophthalmoids, so I have used the recent *Chlorophthalmus* as the post-Cretaceous exemplar for this group.

*Topology used in analyses (Newick format; branch lengths given in Ma).*

1 †*Acrognathus*,  
2 *Chlorophthalmus*;  
(1:1.0,2:94.5):1.0;

*Alepisauroidi.*

There are two extant families of alepisauroids: alepisaurids (lancetfishes) and paralepidids (barracudinas) (Baldwin and Johnson 1996). Fielitz (2004) has shown that †enchodontids (inclusive of †*Eurypholis*, †*Rharbichthys* and †*Saurorhamphus*) and †cimolichthyids are stem alepisaurids. Post-Mesozoic alepisaurids are represented by a Miocene fossil assigned to the extant genus *Alepisaurus* (D'Erasmus 1924). I have adopted the topology recovered by Fielitz (2004), with the addition of †*Prionolepis* as the sister taxon of †*Cimolichthys* (Goody 1968, 1970). Although alepisaurids are common in Cretaceous rocks, no paralepidids of Mesozoic age are known. Cenozoic paralepidids include a series of Eocene-Oligocene forms assigned to the genus †*Holosteus*. It is unclear to me whether the Russian †*Holosteus* is congeneric with the type, †*H. esocinus*, from Bolca; both species are therefore included here as separate terminals.

*Topology used in analyses (Newick format; branch lengths given in Ma).*

- 1 *Paralepis*,
- 2 †*Holosteus mariae*,
- 3 †*Holosteus esocinus*,
- 4 †*Cimolichthys*,
- 5 †*Prionolepis*,
- 6 †*Rharbichthys*,
- 7 †*Palaeolycus*,
- 8 †*Eurypholis*,
- 9 †*Saurorhamphus*,
- 10 †*Enchodus*,
- 11 *Alepisaurus*;

((1:44.268,3:1.0,2:21.2):50.9,(11:94.168,((4:8.7,5:1.0):4.0,(6:4.0,(7:25.9,(9:5.2,8:5.2):1.0,10:24.9):1.0):1.0):1.0):1.0);

### *Aulopiformes* incertae sedis.

Here I deal with three groups of aulopiforms that are of uncertain phylogenetic placement: †Nardorexidae, †Ichthyotringidae and †Dercetidae. †Nardorexidae is known from a single genus, †*Nardorex*, from the Campanian-Maastrichtian of Nardó (Taverne 2004d). This taxon has been described as an alepisauroid, but its position within that clade is unclear. The only †ichthyotringid known from Maastrichtian deposits is †*Apateodus* (Kruzinga 1924); this genus is also known from earlier deposits, including the English Chalk (Goody 1969) and the Niobrara Formation (Carpenter 2003; AMNH 11560). A diversity of †dercetids are known from terminal Cretaceous deposits. The Campanian-Maastrichtian assemblage from Nardó contains four genera (†*Apuliadercetus*; †*Nardodercetus*; †*Ophidercetus*; †*Caudadercetus*; Taverne 2005a, b, 2006a, b), and the Maastrichtian chalks of Holland yield the remains of †*Rhynchodercetus* (NHMM 1993119) and †*Dercetis*-like forms (NHMM 1990027; other specimens in private collections). The Danian †*Scanidercetus* is the only post-Cretaceous member of this radiation, but is too poorly preserved to be included here.

*Myctophiformes.*

Myctophiforms are the living sister-group of acanthomorphs (Rosen 1973; Johnson 1992; Stiassny 1996; Smith and Wheeler 2006), and comprise two extant families: Myctophidae and Neoscopelidae. Mesozoic myctophiforms are limited to †*Sardinoides* (specifically the Campanian †*S. monasteri*; Rosen 1973), which has been associated with neoscopelids (Patterson 1993b), but is probably a stem myctophiform (Prokofiev 2006). The Paleocene (Thanetian) †*Neocassandra* also branches crownward of †*Sardinoides*. Crown myctophiforms are limited to the Cenozoic, and exemplars include the Eocene (Lutetian) †*Beckerophotus* (Neoscopelidae), and the Oligocene (Rupelian) †*Eomyctophum* and †*Oligophus* (both Myctophidae).

*Topology used in analyses (Newick format; branch lengths given in Ma).*

1 †*Sardinoides*,  
2 †*Neocassandra*,  
3 †*Beckerophotus*,  
4 †*Eomyctophum*,  
5 †*Oligophus*;

(1:1.0,(2:1.0,(3:1.0,(4:1.0,5:1.0):12.0):15.4):14.8);



*Lampridiformes.*

The relationships and content of Lampridiformes given here follows systematic revision being conducted by the author. 'Aipichthyoids' are placed in a polytomy on the lampridiform stem, and two are included here: †*Aipichthys* and †*Aipichthyoides*, both of which are Cenomanian in age. †*Aspesaipichthys* is an 'aipichthyoid' represented by a single incomplete specimen from Nardò (Taverne 2004b), but is too poorly preserved to be included in this analysis. The Campanian-Maastrichtian †*Veronavelifer* (Sorbini and Sorbini 1999) is more primitive than extant lampridiforms in mandibular and caudal structure, and I regard it as branching from the lampridiform stem crownward of 'aipichthyoids'. Known crown lampridiforms are limited to the Cenozoic, and representatives incorporated in this study include: †*Veronavelifer* (a veliferid), from the Ypresian of Bolca; †*Bathysoma* (a stem taeniosome), from the Danian of Sweden; †*Analectis* (a stem taeniosome), from the Rupelian of the Caucasus.

*Topology used in analyses (Newick format; branch lengths given in Ma).*

1 †*Aipichthyoides*,  
2 †*Aipichthys*,  
3 †*Nardovelifer*,  
4 †*Veronavelifer*,  
5 †*Bathysoma*,  
6 †*Palaeocentrotus*,  
7 †*Analectis*;

(2:2.0,(1:1.0,(3:1.0,(4:15.1,(5:1.0,6:14.1,7:34.3):1.0):2.8):28.0):1.0)  
;

*Polymixiiformes.*

Cretaceous polymixiids are represented by a diversity of taxa; those considered for this study include: †*Omosomopsis*, from the Cenomanian of Morocco (Gaudant 1978); †*Pycnosterinx*, from the Santonian of Sahel Alma (Patterson 1964); †*Omosoma*, from the Cenomanian-Santonian of several localities (Patterson 1964); †*Dalmatichthys* from the Turonian of the Balkans (Radovčić 1975); †*Berycopsia*, from the Turonian of Balkans (Radovčić 1975); †*Berycormus*, from the Campanian of Westphalia (Patterson 1964); †*Homonotichthys*, from the Cenomanian of the English Chalk (Patterson 1964). In addition to named forms, this analysis incorporates an undescribed polymixiid (cf. *Omosoma*) from the type Maastrichtian of the Netherlands. Previously considered rare (Patterson 1993a, b), there are several occurrences of polymixiids in Cenozoic deposits. These include the Rupelian *Digoria* (Bannikov and Parin 1997) and two unnamed taxa from Scandinavia: one from the Danian of Sweden ('*Hoplopteryx*' of Davis 1890 is in fact a polymixiid broadly similar to †*Homonotichthys*; pers. obs.) and another from the Ypresian Fur Formation of Denmark (Patterson 1993a, b). There is currently no hypothesis of relationships among fossil polymixiids. I have therefore united all Cenozoic taxa in a clade, and placed this radiation in an unresolved polytomy with Cretaceous forms such that a single that lineage crosses the K-P boundary.

*Topology used in analyses (Newick format; branch lengths given in Ma).*

- 1 †*Omosomopsis*,
- 2 †*Pycnosterinx*,
- 3 †*Omosoma*,
- 4 †*Berycopsia*,
- 5 †*Dalmatichthys*,
- 6 †Maastrichtian polymixiid,
- 7 †*Berycopsis*,
- 8 †*Homonotichthys*,

9 †Danian polymixiid,  
10 †Fur polymixiid,  
11 †*Digoria*;

(1:1.0,2:10.1,3:10.1,4:5.2,5:5.2,6:29.0,7:23.9,8:1.0,(9:1.0,10:14.1,11:  
34.3):31.8);

†*Asineopidae*.

Following Patterson (1993a, b), I consider the Eocene †*Asineops* closely related to the Cretaceous (Campanian-Maastrichtian) †*Nardoichthys*; here these two are placed as sister taxa within the nominal family *Asineopidae*.

*Topology used in analyses (Newick format; branch lengths given in Ma).*

1 †*Asineops*,  
2 †*Nardoichthys*;

(1:26.1,2:1.0);

*Zeiformes.*

Cretaceous zeiforms are represented by †*Cretzeus* (Tyler *et al.* 2000) from the Campanian-Maastrichtian of Nardò, Italy. This genus is placed within the crown group, most closely related to *Stethopristes* and *Cyttopsis*. Another Cretaceous acanthomorph, the Cenomanian †*Palaeocyttus* (Gaudant 1978) has been identified as a zeiform (but see Tyler *et al.* 2003); if this interpretation is correct, the genus branches from the stem. Two stem zeiforms are described from the early Eocene Fur Formation of Denmark: †*Archaeozeus* and †*Protozeus* (Tyler *et al.* 2000). The cladogram given by Tyler and Santini (2005: fig. 9) indicates survival of at least five zeiform lineages across the K-P boundary. In this analysis, members of these lineages include: †*Archaeozeus*, †*Protozeus*, *Cyttopsis*, [*Cyttus* + *Neocyttus*], and [*Zenopsis* + *Zeus*]. Zeid genera are represented by two lower Oligocene species (reviewed in Baciu *et al.* 2005).

*Topology used in analyses (Newick format; branch lengths given in Ma).*

- 1 †*Archaeozeus*,
- 2 †*Protozeus*,
- 3 †*Cretzeus*,
- 4 *Cyttopsis*,
- 5 *Cyttus*,
- 6 *Neocyttus*,
- 7 *Zenopsis*,
- 8 *Zeus*;

(1:21.9,(2:20.9,((5:1.0,6:1.0):67.5,((3:1.0,4:66.5):1.0,(7:1.0,8:1.0):38.1):1.0):1.0):1.0);

*'Beryciformes'*.

There are conflicting hypotheses concerning the interrelationships of the four nominal 'beryciform' groups. Morphological character sets have been used to argue for two arrangements that render 'beryciforms' *sensu lato* paraphyletic: Stiassny and Moore (1992) and Moore (1993a, b) argued holocentroids are more closely related to 'higher' acanthomorphs than other 'beryciforms', but Patterson and Johnson (1993) recognized stephanoberycoids and [Berycoidei + Trachichthyoidei + Holocentroidei] as successively more proximal clades outside their Euacanthopterygii. Sequence data diverge on the question of 'beryciform' monophyly (grade: Miya *et al.* 2003; clade: Smith and Wheeler 2006), but they consistently recover a clade comprising holocentroids plus stephanoberycoids, with berycoids nested within the latter. Following these results, I conservatively consider trachichthyoids independently of all remaining 'beryciform' groups.

*Trachichthyoidei.*

Here I take Trachichthyoidei to comprise trachichthyids plus four other extant families: Monocentridae, Anomalopidae, Diretmidae and Anoplogastridae (Moore 1993a, b). Many Cretaceous acanthomorphs have been associated with trachichthyoids in general, and trachichthyids in particular: †*Lissoberyx*, †*Libanoberyx*, †*Stichopteryx*, †*Acrogaster*, †*Gnathoberyx*, †*Hoplopteryx*, †*Cryptoberyx*, †*Pattersonoberyx*, †*Plesioberyx*, †*Antarctiberyx*, †*Hgulichthys* and †*Gigantokranion* (Gayet 1980, 1982; Grande and Chatterjee 1987; Patterson

1993; Otero *et al.* 1995; Taverne 2003a). The link between †*Cryptoberyx*, †*Pattersonoberyx*, †*Plesioberyx* and trachichthyids has been questioned by Patterson (1993), who also suggested that all other Mesozoic 'trachichthyoids' might fall outside the crown. The two analyses that have addressed the placement of fossil trachichthyoids have come to divergent conclusions: Moore (1993a), like Patterson (1993a), places these fossils along the trachichthyoid stem, whereas Otero *et al.* (1995) nest them within the crown, as stem trachichthyids. I am doubtful of this latter conclusion. The shortest network in Otero *et al.* (1995) is rooted on an imaginary outgroup, and unites fossil trachichthyoids with trachichthyids using a combination of unconvincing characters and plesiomorphies. Here I adopt a conservative approach, placing all Mesozoic fossils in a basal polytomy. The crown exemplar is the Oligocene (Rupelian) trachichthyid †*Gephyroberyx robustus* (Danil'chenko 1960), the only Cenozoic trachichthyoid represented by body fossil remains. Paleocene reports of †*Hoplopteryx* (Davis 1890) are in error (see 'Polymixiidae' above), but this genus does appear to occur in the type Maastrichtian (pers. obs.).

*Topology used in analyses (Newick format; branch lengths given in Ma).*

1 †*Hoplopteryx*,  
 2 †*Gnathoberyx*,  
 3 †*Judeoberyx*,  
 4 †*Tubantia*,  
 5 †*Lissoberyx*,  
 6 †*Stichopteryx*,  
 7 †*Acrogaster*,  
 8 †*Libanoberyx*,  
 9 *Gephyroberyx*;

(9:66.1,1:1.0,2:1.0,3:1.0,4:23.9,5:1.0,6:1.0,7:11.0,8:1.0);

*Holocentroidei.*

A series of Cretaceous taxa have been associated with extant holocentrids: †*Caproberyx*, †*Trachichthyoides*, †*Parospinus*, †*Alloberyx*, †*Adriacentrus*, †*Ctenocephalichthys*, †*Erugocentrus*, †*Pelotius*, †*Plesioberyx*, †*Pattersonoberyx*, †*Kansius*, †*Stichocentrus* and unnamed forms from the Niobrara Formation of North America (Patterson 1967; Gayet 1980, 1982; Stewart 1984; Patterson 1993a; Gallo-da-Silva and de Figueiredo 1999). All of these Cretaceous examples lack characters common to living holocentrids, and probably branch from the stem (Stewart 1984; Patterson 1993a). Here I place these Mesozoic taxa in a basal polytomy, and include †*Eoholocentrum* (Sorbini and Tirapelli 1975), †*Berybolcensis* (Sorbini 1984) and †*Tenuicentrum* (Sorbini 1975), all from the Ypresian of Bolca, as Paleogene representatives. Following Stewart (1984), these crown holocentroids (stem myripristines) branch as follows: †*Eoholocentrum* [†*Berybolcensis* + †*Tenuicentrum*].

#### *Berycoidei.*

The body fossil record of berycoids is scant, represented only by the Oligocene (Rupelian) †*Berycormus* (Arambourg 1967). Following molecular solutions, this fossil genus is placed as the sister taxon of the stephaoberycoid exemplar discussed below.

#### *Stephanoberycoidei.*

There are four reports of fossil stephanoberycoids, all from the Cenozoic: the melamphid †*Scopelogadus? capistranensis* from the upper Miocene of California,



USA (Ebeling 1962); an unnamed species of *Scopelogadus* from the Miocene of Ravenna, Italy (Corsi *et al.* 1999); an indeterminate melamphid from the ?Miocene of Aichi Prefecture, Japan; a 'cetomimid' from the Eocene (Ypresian) of Denmark (Bonde 1997, 2008; Bonde *et al.* 2008). The first of these is the most reliable, and is used here as a stephanoberycoid exemplar. The mandible in available material is poorly preserved, so measurements are derived from extant *Scopelogadus*. The Italian material has not been formally described or figured, and I have been unable to find any additional details on the Japanese melamphid. I have briefly examined the putative Danish whalefish (MGUH DK 70); it is certainly not a cetomimid *sensu stricto*. The dorsal fin does seem to be posteriorly positioned, with an extensive series of what appear to be supraneurals placed anterior to the first fin-ray bearing pterygiophore (these ossifications closely resemble the more posteriorly placed pterygiophores, but do appear to articulate with fin rays or spines); both of these apomorphic features are found in some stephanoberycoids (Paxton *et al.* 2001; however, many other stephanoberycoids lack supraneurals altogether: Merrett and Moore 2005). I have excluded this potentially important specimen from the analysis, pending a more exacting account of its anatomy.

*Topology used in analyses (Newick format; branch lengths given in Ma).*

1 †Niobrara holocentroid,  
2 †Kansius,  
3 †Pelotius,  
4 †Caproberyx,  
5 †Adriacentrus,  
6 †Ctenocephalichthys,  
7 †Eurogocentrus,  
8 †Plesioberyx,  
9 †Stichocentrus,  
10 †Eoholocentrum,

- 11 †*Berybolcensis*,
- 12 †*Tenuicentrum*,
- 13 †*Berycormus*,
- 14 *Scopelogadus*;

((13:1.0,14:24.068):66.1,(1:11.0,2:11.0,3:8.7,4:8.7,5:8.7,6:11.0,7:8.7,8:1.0,9:1.0,(10:2.0,(11:1.0,12:1.0):1.0):43.9):1.0);

*Syngnathoidei.*

Syngnathoids are traditionally placed with gasterosteoids in Gasterosteiformes (Johnson and Patterson 1993; Orr 1995; Keivany and Nelson 2006). Mitochondrial (Kawahara *et al.* 2008) and nuclear (Smith and Wheeler 2006) sequence data widely separate these two groups, casting doubt on the coherence of a 'classical' gasterosteiform radiation; I only consider fossil syngnathoids (inclusive of pegasids) here. †*Gasterorhamphosus*, from the Campanian-Maastrichtian of Nardò, Italy, is the only Cretaceous syngnathoid known to date (Sorbini 1981). Sorbini (1981) described this genus as a macrorhamphosid, but Patterson (1993a) suggested that it might be a stem gasterosteiform (in the traditional sense of that group). More recently, Orr (1995) has argued convincingly that †*Gasterorhamphosus* branches from the common stem of Macrorhamphosidae + Centriscidae; this placement is accepted here. Three sister-family pairs are consistently recovered by both molecular and anatomical analyses: Centriscidae + Macrorhamphosidae (Centriscoidea); Aulostomidae + Fistularidae (Aulostomoidea); Syngnathidae + Solenostomidae (Syngnathoidea). Each of the three possible arrangements of these three groups has found support (Aulostomoidea [Syngnathoidea + Centriscoidea]: Pietsch 1978; Orr 1995; Syngnathoidea [Aulostomoidea + Centriscoidea]: Keivany and Nelson 2006; Centriscoidea [Aulostomoidea + Syngnathoidea]: Kawahara *et al.* 2008). There is considerable disagreement concerning the position of pegasids (here considered to include †*Rhamphosus*; Pietsch 1978; Orr 1995) within Syngnathoidei. They are placed as the sister-group of: all remaining syngnathoids (Keivany and Nelson 2006); Syngnathoidea (Pietsch 1978; Orr 1995;

Kawahara *et al.* 2008); Centriscoidea (Smith and Wheeler 2006). To accommodate this uncertainty, I have placed Centriscoidea, Syngnathoidea, Aulostomoidea, and Pegasidae in a polytomy. †Aulorhamphidae (Tyler 2004), a nominal family known exclusively from fossils, is also included here. Members of this group are characterized by a suite of plesiomorphies that suggest they branch from the syngnathiform stem (Tyler 2004).

*Topology used in analyses (Newick format; branch lengths given in Ma).*

1 †Aulorhamphus,  
 2 †Veronarhamphus,  
 3 †Rhamphosus,  
 4 †Gasterorhamphosus,  
 5 †Protorhamphosus,  
 6 †Paraeoliscus,  
 7 †Aeoliscoides,  
 8 †Urosphenopsis,  
 9 †Fur aulostomid,  
 10 †Urosphen,  
 11 †Eoaulostomus,  
 12 †Synhypuralis,  
 13 †Jungersenichthys,  
 14 †Solenorhynchus,  
 15 †Calamostoma,  
 16 †Proselenostomus,  
 17 'Syngnathus';

((1:1.0,2:1.0):18.9,(3:18.9,(4:1.0,(5:1.0,6:8.2,7:8.2):9.7):1.0,(14:1.0,15:1.0,16:1.0,17:1.0):17.9,(8:1.0,9:8.2,10:8.2,11:8.2,12:8.2,13:8.2):10.7):1.0):1.0;

### *Tetraodontiformes*

Fossil and living tetraodontiforms have been the subject of considerable systematic work (Tyler and Santini 2003, and references therein). The scheme of interrelationships among tetraodontiforms adopted here derives from Tyler and Santini (2003). Stem tetraodontiforms are said to be represented by three Cretaceous genera: †*Protriacanthus* (Cenomanian), †*Plectocretacius* (Cenomanian), and †*Cretatriacanthus* (Campanian-Maastrichtian) (Tyler and Sorbini 1996). These taxa form a clade to the exclusion of all post-Cretaceous tetraodontiforms, all of which appear to be nested within the crown radiation (Tyler and Santini 2003); this topology only invokes a single lineage crossing the Cretaceous/Paleogene boundary for which trait values must be inferred.

This analysis considers all three putative members of the stem, which are placed in the nominal group †Plectocretacioidea, as well as fossil representatives of nine out of the remaining ten suprafamilial clades recognized by Tyler and Santini (2003): Triacanthodoidea (†*Prohollardia*, †*Carpathospinosus*), Triacanthoidea (†*Protacanthodes*, †*Acanthopleurus*), †Moclaybalistoidea (†*Moclaybalistes*), †Bolcabalistoidea (†*Bolcabalistes*), Balistoidea (†*Oligobalistes*, †*Balistomorphus*), Ostracioidea (†*Proaracana*), †Eoplectoidea (†*Eoplectus*), Triodontoidea (†*Eotetraodon*), Tetraodontoidea (†*Archaeotetraodon*). The final suprafamily, Moloidea (ocean sunfishes), is not represented in the fossil record by complete material.

*Topology used in analyses (Newick format; branch lengths given in Ma).*

- 1 †*Protriacanthus*,
- 2 †*Plectocretacius*,
- 3 †*Cretatriacanthus*,
- 4 †*Prohollardia*,
- 5 †*Carpathospinosus*,
- 6 †*Protoacanthodes*,
- 7 †*Acanthopleurus*,
- 8 †*Cryptobalistes*,

9 †*Moclaybalistes*,  
10 †*Bolcabalistes*,  
11 †*Oligobalistes*,  
12 †*Balistemorphus*,  
13 †*Proaracana*,  
14 †*Eoplectus*,  
15 †*Eotetraodon*,  
16 †*Archaeotetraodon*;

((3:30.0,(1:1.0,2:1.0):1.0):1.0,((4:1.0,5:1.0):25.2,((14:2.0,(15:1.0,16  
:21.2):1.0):3.0,((6:3.0,(7:1.0,8:1.0):22.2):1.0,(9:3.0,(10:2.0,(13:1.0,  
(11:1.0,12:1.0):20.2):1.0):1.0):1.0):1.0):1.0):41.9):1.0;

### III. Maastrichtian fishes (observed plus implied): trait values.

Supporting table 1. ‘Raw’ (phylogenetically) uncorrected trait values for observed and implied taxa present in the Maastrichtian.

| Taxon or clade                                  | E | N | R | Gradual model |                                  | Punctuated model |                                  |
|-------------------------------------------------|---|---|---|---------------|----------------------------------|------------------|----------------------------------|
|                                                 |   |   |   | MA            | Body size (ln[mm <sup>2</sup> ]) | MA               | Body size (ln[mm <sup>2</sup> ]) |
| *[† <i>Oropycnodus</i> + † <i>Pycnodus</i> ]    |   |   |   | 0.819722      | 9.448557                         | 0.535552         | 9.903729                         |
| *† <i>Nursallia</i>                             |   |   |   | 0.669618      | 10.36527                         | 0.708333         | 10.50807                         |
| *† <i>Abdopalistum</i>                          |   |   |   | 0.476232      | 10.01563                         | 0.434829         | 9.96136                          |
| *† <i>Palaeobalistum</i>                        |   |   |   | 0.504616      | 11.03736                         | 0.682077         | 9.770636                         |
| † <i>Anomeodus</i>                              |   |   |   | 0.551425      | 9.508355                         | 0.551425         | 9.508355                         |
| † <i>Protosphyraena</i>                         | X |   |   | 0.236985      | 13.17689                         | 0.236985         | 13.17689                         |
| † <i>Belonostomus</i>                           | X |   |   | 0.109343      | 9.885555                         | 0.109343         | 9.885555                         |
| † <i>Xiphactinus</i>                            | X |   |   | 0.358566      | 14.6274                          | 0.358566         | 14.6274                          |
| † <i>Saurodon</i>                               | X |   |   | 0.239034      | 12.66322                         | 0.239034         | 12.66322                         |
| † <i>Saurocephalus</i>                          | X |   |   | 0.292023      | 12.95888                         | 0.292023         | 12.95888                         |
| † <i>Apsopelix</i>                              | X |   |   | 0.502488      | 9.97621                          | 0.502488         | 9.97621                          |
| * <i>Elops</i>                                  |   |   | X | 0.357725      | 9.804182                         | 0.36272          | 9.903115                         |
| *[† <i>Protarpon</i> + † <i>Promegalops</i> ]   |   |   |   | 0.321844      | 11.932                           | 0.304573         | 11.32415                         |
| * <i>Albula</i>                                 |   |   |   | 0.36093       | 11.43392                         | 0.349807         | 12.54476                         |
| <i>Isteus</i>                                   |   |   |   | 0.48666       | 10.73182                         | 0.48666          | 10.73182                         |
| *† <i>Laytonia</i>                              |   |   |   | 0.496518      | 7.767609                         | 0.372316         | 7.4808                           |
| *† <i>Mylomyrus</i>                             |   |   |   | 0.271224      | 8.199944                         | 0.260906         | 8.505817                         |
| * <i>Anguilla</i>                               |   |   |   | 0.266815      | 9.207772                         | 0.257203         | 10.10532                         |
| *† <i>Eoanguilla</i>                            |   |   |   | 0.28771       | 8.027368                         | 0.291765         | 8.182928                         |
| *† <i>Proteomyrus</i>                           |   |   |   | 0.331026      | 7.546314                         | 0.35546          | 7.523281                         |
| *[† <i>Bolycyrus</i> +† <i>Anguilloides</i> ]   |   |   |   | 0.258127      | 8.473007                         | 0.286315         | 8.851255                         |
| * <i>Simenchelys</i>                            |   |   | X | 0.347845      | 8.04305                          | 0.5              | 8.949366                         |
| *[ <i>Conger</i> + <i>Serrivomer</i> ]          |   |   | X | 0.237038      | 7.994677                         | 0.253681         | 9.079588                         |
| * <i>Coloconger</i>                             |   |   | X | 0.227738      | 8.125915                         | 0.208589         | 9.521287                         |
| * <i>Derichthys</i>                             |   |   | X | 0.259994      | 7.431959                         | 0.315217         | 7.806566                         |
| *[† <i>Milananguilla</i> +† <i>Ophichthus</i> ] |   |   |   | 0.28245       | 7.530983                         | 0.263871         | 8.172096                         |
| * <i>Chilorhinus</i>                            |   |   | X | 0.200429      | 6.80903                          | 0.185185         | 6.480964                         |
| *† <i>Patavichthys</i>                          |   |   |   | 0.191508      | 6.223254                         | 0.188679         | 5.89976                          |
| * <i>Muraena</i>                                |   |   | X | 0.204663      | 7.124016                         | 0.243094         | 7.890246                         |
| *† <i>Paranguilla</i>                           |   |   |   | 0.244345      | 8.576722                         | 0.282609         | 9.636516                         |
| * <i>Nemichthys</i>                             |   |   | X | 0.116956      | 7.082866                         | 0.022624         | 8.45794                          |
| *[ <i>Cyema</i> + <i>Eurypharynx</i> ]          |   |   | X | 0.109596      | 6.534716                         | 0.048793         | 7.12967                          |
| † <i>Pentanogmius</i>                           | X |   |   | 0.274949      | 13.33781                         | 0.274949         | 13.33781                         |
| † <i>Diplomystus</i>                            |   |   |   | 0.584396      | 10.18048                         | 0.584396         | 10.18048                         |
| † <i>Gasteroclupea</i>                          |   |   |   | 0.59589       | 5.816992                         | 0.59589          | 5.816992                         |
| * <i>Engraulis</i>                              |   |   |   | 0.596774      | 7.447563                         | 0.18018          | 6.898169                         |
| *† <i>Palaeodenticeps</i>                       |   |   |   | 0.63134       | 7.047843                         | 0.655914         | 5.164957                         |
| *[ <i>Clupea</i> + <i>Alosa</i> ]               |   |   |   | 0.646842      | 7.825799                         | 0.65571          | 8.026549                         |

|                                                     |   |   |   |          |          |          |          |
|-----------------------------------------------------|---|---|---|----------|----------|----------|----------|
| *[ <i>Spratelloides</i> + <i>Etrumeus</i> ]         |   |   |   | 0.648731 | 8.787176 | 0.637676 | 6.93794  |
| † <i>Italoclupea</i>                                | X | X |   | 0.579125 | 6.822535 | 0.579125 | 6.822535 |
| † <i>Pugliaclupea</i>                               | X | X |   | 0.692414 | 7.754992 | 0.692414 | 7.754992 |
| † <i>Nardoclupea</i>                                | X | X |   | 0.658762 | 9.80641  | 0.658762 | 9.80641  |
| † <i>Sorbininardus</i>                              | X | X |   | 0.782051 | 6.028664 | 0.782051 | 6.028664 |
| † <i>Auplichthys</i>                                | X | X |   | 0.56196  | 7.794502 | 0.56196  | 7.794502 |
| † <i>Lecceichthys</i>                               | X | X |   | 0.779736 | 6.705272 | 0.779736 | 6.705272 |
| * <i>Chanos</i>                                     |   |   | X | 0.677905 | 9.852356 | 0.637478 | 9.727835 |
| * <i>Gonorhynchus</i>                               |   |   | X | 0.78807  | 7.390831 | 0.972452 | 9.207961 |
| † <i>Chanoides</i>                                  |   |   |   | 0.853165 | 9.46959  | 0.853165 | 9.46959  |
| † <i>Sorbinicharax</i>                              | X | X |   | 0.404635 | 6.231013 | 0.404635 | 6.231013 |
| † <i>Pachyrhizodus</i>                              | X |   |   | 0.111361 | 13.09715 | 0.111361 | 13.09715 |
| *† <i>Platinx</i>                                   |   |   |   | 0.619899 | 10.81698 | 0.791866 | 11.3527  |
| *[† <i>Sytchevskia</i> + † <i>Horbatshia</i> ]      |   |   |   | 0.3149   | 5.826072 | 0.283364 | 5.947863 |
| † <i>Ophidercetus</i>                               | X | X |   | 0.231839 | 7.766464 | 0.231839 | 7.766464 |
| † <i>Apuliadercetus</i>                             | X | X |   | 0.198276 | 9.029125 | 0.198276 | 9.029125 |
| † <i>Nardodercetus</i>                              | X | X |   | 0.334641 | 9.885835 | 0.334641 | 9.885835 |
| † <i>Caudadercetus</i>                              | X | X |   | 0.129827 | 9.170035 | 0.129827 | 9.170035 |
| † <i>Dercetus</i>                                   | X |   |   | 0.196078 | 7.802769 | 0.196078 | 7.802769 |
| † <i>Rhynchodercetus</i>                            | X |   |   | 0.15122  | 7.798769 | 0.15122  | 7.798769 |
| † <i>Apateodus</i>                                  | X |   |   | 0.152641 | 11.53294 | 0.152641 | 11.53294 |
| † <i>Nardorex</i>                                   | X | X |   | 0.135283 | 10.66655 | 0.135283 | 10.66655 |
| *[† <i>Agrilichthys</i> + † <i>Labrophagus</i> ]    |   |   |   | 0.297487 | 9.153859 | 0.241588 | 8.466604 |
| * <i>Chloropthalmus</i>                             |   |   | X | 0.26298  | 7.532549 | 0.31457  | 8.412037 |
| *[† <i>Holosteus</i> + <i>Paralepis</i> ]           |   |   |   | 0.149169 | 9.789706 | 0.221842 | 9.963063 |
| * <i>Alepisaurus</i>                                |   |   |   | 0.20931  | 8.969739 | 0.228137 | 9.87157  |
| † <i>Cimolichthys</i>                               | X |   |   | 0.221024 | 12.57673 | 0.221024 | 12.57673 |
| † <i>Enchodus</i>                                   | X |   |   | 0.266241 | 12.23813 | 0.266241 | 12.23813 |
| *[† <i>Neocassandra</i> + † <i>Oligophus</i> ]      |   |   |   | 0.262477 | 7.479207 | 0.223013 | 6.152007 |
| † <i>Nardovelifer</i>                               | X | X |   | 0.340845 | 10.55096 | 0.340845 | 10.55096 |
| *[† <i>Veronavelifer</i> + † <i>Analectis</i> ]     |   |   |   | 0.500648 | 9.514047 | 0.578554 | 8.554756 |
| *[† <i>Danian</i> polymixiid + † <i>Digoria</i> ]   |   |   |   | 0.469615 | 8.736434 | 0.44419  | 8.042042 |
| † <i>Maastrichtian</i> polymixiid                   | X |   |   | 0.396636 | 7.587655 | 0.396636 | 7.587655 |
| † <i>Nardoichthys</i>                               | X | X |   | 0.42735  | 5.770662 | 0.42735  | 5.770662 |
| *† <i>Asineops</i>                                  |   |   |   | 0.420654 | 6.080758 | 0.336617 | 9.972457 |
| *† <i>Archaeozeus</i>                               |   |   |   | 0.531042 | 4.982415 | 0.547537 | 3.018472 |
| *† <i>Protozeus</i>                                 |   |   |   | 0.548279 | 5.200735 | 0.645853 | 3.17722  |
| *[ <i>Cyttus</i> + <i>Neocyttus</i> ]               |   |   | X | 0.522244 | 6.092658 | 0.598194 | 9.065014 |
| *[ <i>Zeus</i> + <i>Zenopsis</i> ]                  |   |   |   | 0.512489 | 6.279295 | 0.55132  | 9.177554 |
| * <i>Cyttopsis</i>                                  |   |   | X | 0.501973 | 6.223905 | 0.540302 | 9.35473  |
| † <i>Cretzeus</i>                                   | X | X |   | 0.491773 | 6.211864 | 0.491773 | 6.211864 |
| * <i>Gephyroberyx</i>                               |   |   |   | 0.387495 | 7.675533 | 0.404412 | 8.210538 |
| † <i>Hoplopteryx</i>                                | X |   |   | 0.31746  | 10.36503 | 0.31746  | 10.36503 |
| † <i>Lissoberyx</i>                                 | X | X |   | 0.340206 | 6.709841 | 0.340206 | 6.709841 |
| *[† <i>Eoholocentrum</i> + † <i>Tenuicentrum</i> ]  |   |   |   | 0.372552 | 8.337156 | 0.379461 | 8.240423 |
| *[† <i>Berycormus</i> + <i>Scopelogadus</i> ]       |   |   |   | 0.447107 | 8.215611 | 0.435672 | 7.310487 |
| *[† <i>Aulorhamphus</i> + † <i>Veronarhamphus</i> ] |   |   |   | 0.562383 | 6.049444 | 0.402511 | 5.688785 |



|                                                        |    |    |    |          |          |          |          |
|--------------------------------------------------------|----|----|----|----------|----------|----------|----------|
| *† <i>Rhamphosus</i>                                   |    |    |    | 0.633504 | 6.281812 | 0.808333 | 7.057373 |
| *[† <i>Protorhamphosus</i> + † <i>Aeoliscoides</i> ]   |    |    |    | 0.637322 | 5.948664 | 0.513746 | 5.402865 |
| *[† <i>Solenorhynchus</i> + † <i>Syngnathus</i> ]      |    |    |    | 0.60016  | 6.102919 | 0.5164   | 5.580949 |
| *[† <i>Urosphenopsis</i> + † <i>Jungersenichthys</i> ] |    |    |    | 0.572092 | 6.440108 | 0.536458 | 6.967403 |
| † <i>Gasterorhamphosus</i>                             | X  | X  |    | 0.675159 | 6.154709 | 0.675159 | 6.154709 |
| *[† <i>Prohollardia</i> + † <i>Balistomorphus</i> ]    |    |    |    | 0.617765 | 6.117125 | 0.514941 | 6.28702  |
| † <i>Cretatriacanthus</i>                              | X  | X  |    | 0.546729 | 5.286397 | 0.546729 | 5.286397 |
|                                                        |    |    |    |          |          |          |          |
| <i>N</i> = 92                                          | 33 | 18 | 14 |          |          |          |          |

Names marked with asterisk (\*) indicate estimated values for inferred boundary-crossing lineages leading to the taxon or set of taxa (which bracket a clade) listed. Column labeled ‘E’ indicates whether the taxon makes its last appearance in the Maastrichtian. Column labeled ‘N’ indicates whether the taxon makes its last appearance in the Nardò assemblage. Column labeled ‘R’ indicates whether the terminal taxon is based on Recent rather than post-Mesozoic fossil material. Final row gives counts for the number of taxa corresponding to each category.

#### IV. Complete logistic regression results.

**Supporting table 2. Logistic regression results. Model: MA in isolation (extinction ~ MA)**

| <b>excluded sets</b> | <b><i>n</i></b> | <b>mode</b> | <b>AIC</b> | <b><i>P</i>parameter</b> | <b>odds ratio</b> |
|----------------------|-----------------|-------------|------------|--------------------------|-------------------|
| none                 | 92(33)          | G           | 121.14     | 0.0934                   | 2.0088            |
|                      |                 | P           | 121.76     | 0.136                    | 1.70265           |
| Nardò                | 74(15)          | G           | 64.488     | 0.00253                  | 7.6906            |
|                      |                 | P           | 66.57      | 0.00448                  | 6.6948            |
| Recent               | 78(33)          | G           | 104.68     | 0.0231                   | 3.0288            |
|                      |                 | P           | 106.38     | 0.0559                   | 2.4616            |
| Nardò,<br>Recent     | 60(15)          | G           | 51.95      | 0.00101                  | 10.272            |
|                      |                 | P           | 54.536     | 0.00224                  | 9.8142            |

For sample sizes (*n*), the figure in parentheses indicates the number out of the total that are extinction victims. Mode refers to model of evolutionary change; gradual (G) or punctuated (P).

**Supporting table 3. Logistic regression results. Model: body size in isolation  
(extinction ~ size).**

| excluded sets    | <i>n</i> | mode | AIC    | <i>P</i> <sub>parameter</sub> | odds ratio |
|------------------|----------|------|--------|-------------------------------|------------|
| none             | 92(33)   | G    | 116.16 | 0.0071                        | -0.2904    |
|                  |          | P    | 119.1  | 0.03114                       | -0.2223    |
| Nardò            | 74(15)   | G    | 50.889 | 0.0000656                     | -0.8337    |
|                  |          | P    | 54.18  | 0.000027                      | -0.8095    |
| Recent           | 78(33)   | G    | 104.98 | 0.0265                        | -0.2402    |
|                  |          | P    | 105.40 | 0.0337                        | -0.2174    |
| Nardò,<br>Recent | 60(15)   | G    | 48.639 | 0.000235                      | -0.7665    |
|                  |          | P    | 50.28  | 0.000393                      | -0.7217    |

For sample sizes (*n*), the figure in parentheses indicates the number out of the total that are extinction victims. Mode refers to model of evolutionary change; gradual (G) or punctuated (P).

**Supporting table 4. Model: body size and MA in conjunction (extinction ~ MA + size).**

| <b>excluded sets</b> | <b><i>n</i></b> | <b>mode</b> | <b>AIC</b> | <b><i>p</i>parameter</b>     | <b>odds ratio</b>         |
|----------------------|-----------------|-------------|------------|------------------------------|---------------------------|
| none                 | 92(33)          | G           | 117.23     | MA: 0.3370; size: 0.0187     | MA: 1.2001; size: -0.2633 |
|                      |                 | P           | 120.09     | MA: 0.3199; size: 0.0621     | MA: 1.1637; size: -0.1984 |
| Nardò                | 74(15)          | G           | 43.101     | MA: 0.014817; size: 0.000271 | MA: 8.7568; size: -0.8382 |
|                      |                 | P           | 47.546     | MA: 0.018717; size: 0.000358 | MA: 7.1761; size: -0.7859 |
| Recent               | 78(33)          | G           | 104.38     | MA: 0.115; size: 0.136       | MA: 2.2302; size: -0.1740 |
|                      |                 | P           | 105.69     | MA: 0.198; size: 0.109       | MA: 1.7324; size: -0.1738 |
| Nardò,<br>Recent     | 60(15)          | G           | 39.915     | MA: 0.01118; size: 0.00247   | MA: 9.5504; size: -0.6956 |
|                      |                 | P           | 41.957     | MA: 0.02026; size: 0.00191   | MA: 9.5135; size: -0.6588 |

For sample sizes (*n*), the figure in parentheses indicates the number out of the total that are extinction victims. Mode refers to model of evolutionary change; gradual (G) or punctuated (P).

## VI. Global topology for independent contrasts analysis.

The relationships among the higher-level clades reviewed in the earlier section derives from several studies targeting different regions of teleost phylogeny. References, arranged by areas of the tree, are: Patterson and Rosen (1977), Patterson (1977), Nursall (1996), Hurley *et al.* (2006) (teleost stem); Patterson and Rosen (1977), Taverne (2000b), Hurley *et al.* (2006) (primitive' [i.e., non-clupeocephalan] teleosts); Lecointre and Nelson (1996) (Clupeomorpha + Ostariophysi); Rosen (1973), Johnson (1992), Johnson and Patterson (1996), Cavin (2001b) (Euteleostei); Johnson and Patterson (1993); Smith and Wheeler (2006) (Acanthomorpha). Following Taverne (2000b), I place tsselfatiiforms on the clupeocephalan stem. Pachyrhizodontoids are placed as 'protoacanthopterygians', following Forey *et al.* (2003) and Cavin (2001b). Uncertainty surrounding the position of †*Chanoides* centers on its position within Otophysi (either within the crown or along the stem; Patterson 1984). Since no other members of this radiation are included in the analysis, this genus is simply placed as sister to gonorhynchiformes. †Dercetids are placed in an unresolved clade, and this group, along with †*Nardorex* and †*Apateodus*, is placed in a basal polytomy with the resolved clade uniting all remaining alepisauroids included in this analysis.

The independent contrasts analysis concerns only those taxa going extinct at or surviving the end of the Cretaceous. Therefore the dataset analyzed was limited to taxa observed in Maastrichtian deposits, or boundary-crossing individuals inferred on the basis of phylogeny.

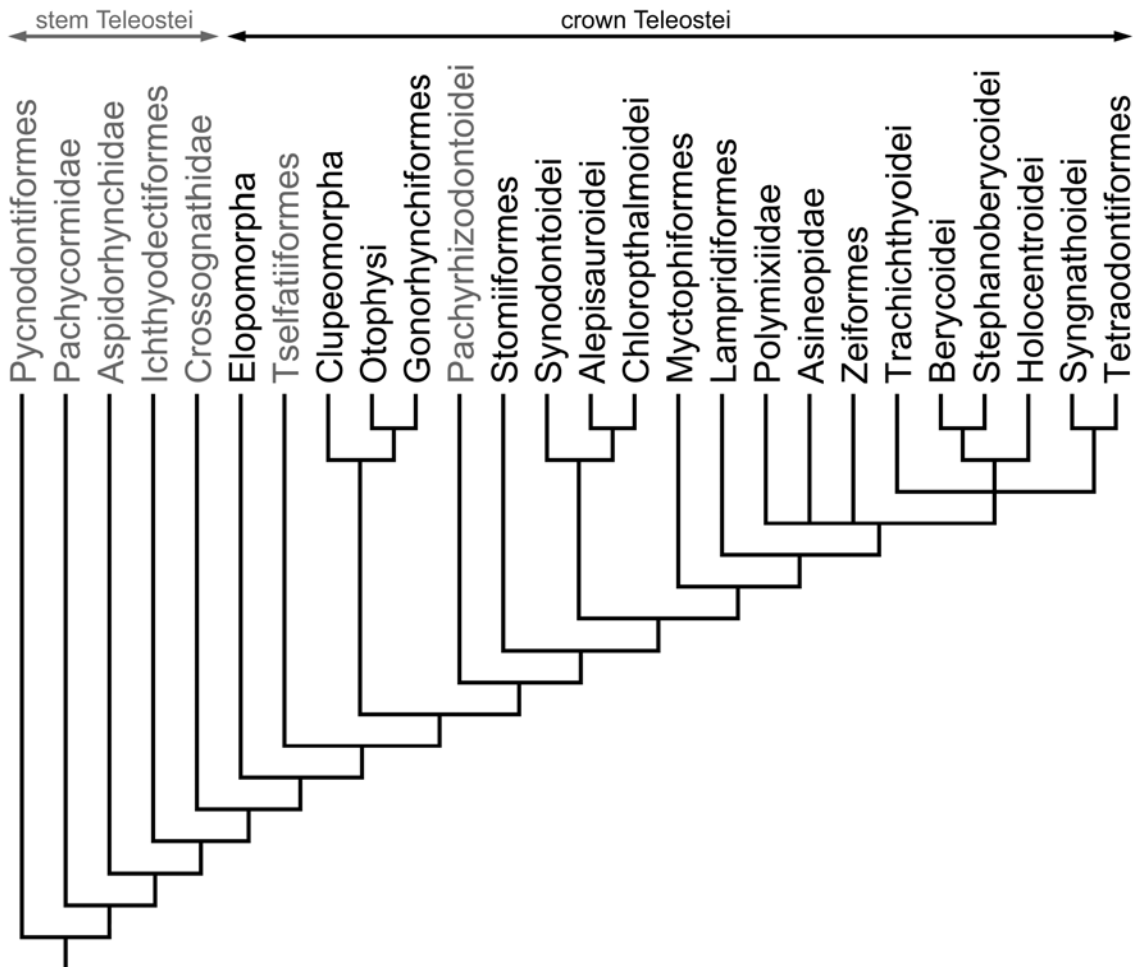

Supporting figure 1. Global phylogeny relating the clades reviewed in the above section. This ‘backbone’ was used in conjunction with the topologies discussed previously when deriving independent contrasts from raw genus-level trait values. Only observed Maastrichtian genera and inferred boundary-crossers were considered. Extinct groups shown in grey.

## VI. Phylogenetically independent contrasts: values.

For details of the different approaches to estimating independent contrasts (i.e., the Brunch and Cruch algorithms), consult Materials and Methods in the main text and the manual accompanying CAIC (Purvis and Rambaut 1995)

### Supporting table 5. Independent contrasts: BRUNCH algorithm applied to gradual ‘raw’ (phylogenetically uncorrected) dataset.

| $\Delta MA$ | $\Delta \text{Body size (ln[mm}^2\text{])}$ |
|-------------|---------------------------------------------|
| -0.0051     | -0.00602                                    |
| 0.01892     | 0.10302                                     |
| -0.03552    | -0.41536                                    |
| -0.00592    | -0.28706                                    |
| -0.03136    | 0.46071                                     |
| 0.00502     | 0.50962                                     |
| -0.03649    | -0.57439                                    |
| 0.00335     | -0.15505                                    |
| -0.00417    | -0.34278                                    |
| -0.08334    | 0.98546                                     |
| -0.04308    | 1.39217                                     |
| -0.22426    | -1.61929                                    |
| 0.03793     | -0.76273                                    |
| -0.21407    | 1.81952                                     |
| -0.03388    | 1.00321                                     |
| -0.15231    | 1.09704                                     |

Phylogenetically independent contrasts for changes in mechanical advantage ( $\Delta MA$ ) and body size ( $\Delta \text{Body size}$ ) associated with the lineage leading to clades (either single genus or multi-genus) making their last appearance in the Maastrichtian. These values are derived from the dataset generated under a model of gradual trait change. Contrasts calculated using the BRUNCH algorithm as implemented in CAIC (Purvis and Rambaut 1995).

**Supporting table 6. Independent contrasts: BRUNCH algorithm applied to punctuated ‘raw’ (phylogenetically uncorrected) dataset.**

| $\Delta MA$ | $\Delta \text{Body size (ln[mm}^2\text{])}$ |
|-------------|---------------------------------------------|
| -0.02426    | -1.57143                                    |
| 0.08071     | 0.37592                                     |
| 0.01589     | -0.50031                                    |
| -0.01066    | -0.39436                                    |
| -0.0404     | 0.17473                                     |
| 0.01054     | 1.43424                                     |
| -0.02378    | -0.22719                                    |
| 0.04537     | -2.1009                                     |
| -0.09636    | -1.25134                                    |
| -0.11391    | 1.47469                                     |
| -0.06704    | 0.98372                                     |
| -0.22426    | -1.61929                                    |
| 0.03583     | -0.60206                                    |
| -0.26984    | 1.66839                                     |
| -0.03068    | 0.9874                                      |
| -0.12577    | 1.07731                                     |

Phylogenetically independent contrasts for changes in mechanical advantage ( $\Delta MA$ ) and body size ( $\Delta \text{Body size}$ ) associated with the lineage leading to clades (either single genus or multi-genus) making their last appearance in the Maastrichtian. These values are derived from the dataset generated under a model of punctuated trait change. Contrasts calculated using the BRUNCH algorithm as implemented in CAIC (Purvis and Rambaut 1995).



**Supporting table 7. Independent contrasts: CRUNCH algorithm applied to gradual 'raw' (phylogenetically uncorrected) dataset.**

| 'Extinction value' | $\Delta$ MA | $\Delta$ Body size (ln[mm <sup>2</sup> ]) |
|--------------------|-------------|-------------------------------------------|
| 0                  | -0.00368    | -0.27407                                  |
| 0.5                | -0.0051     | -0.00602                                  |
| 0.5                | 0.01892     | 0.10302                                   |
| 0.24019            | 0.0261      | -0.10725                                  |
| 0.06934            | 0.02535     | 0.07067                                   |
| 0.5                | -0.03552    | -0.41536                                  |
| 0.53452            | -0.00592    | -0.28706                                  |
| 0                  | 0.02261     | -0.1693                                   |
| 0.16667            | -0.01714    | 0.33905                                   |
| 0.53452            | -0.03136    | 0.46071                                   |
| 0                  | 0.03728     | -0.06077                                  |
| 0.17588            | -0.0012     | -0.16538                                  |
| 0.44491            | 0.00191     | 0.11443                                   |
| 0.5                | -0.03649    | -0.57439                                  |
| 0.04714            | 0.00247     | 0.18852                                   |
| 0.5                | 0.00335     | -0.15505                                  |
| 0.20059            | 0.01822     | -0.47261                                  |
| 0.5                | -0.00417    | -0.34278                                  |
| 0                  | -0.01668    | 0.54272                                   |
| 0.16987            | -0.02681    | 0.31223                                   |
| 0                  | 0.02432     | -0.04684                                  |
| 0.46468            | -0.07555    | 1.01967                                   |
| 0.45262            | -0.04615    | 1.39609                                   |
| 0.23236            | 0.07096     | 0.90584                                   |
| 0.14105            | 0.00587     | 0.56301                                   |
| 0.5                | -0.22426    | -1.61929                                  |
| 0.16667            | -0.00062    | -0.3398                                   |
| 0.15318            | -0.01171    | -0.30009                                  |
| 0.03599            | 0.02128     | -1.17621                                  |
| 0.15189            | 0.05998     | -0.623                                    |
| 0.06758            | -0.01294    | 1.35252                                   |
| 0.24625            | 0.03682     | -0.78668                                  |
| 0.51093            | -0.21336    | 1.80241                                   |
| 0                  | 0.06286     | -0.35105                                  |
| 0.05026            | -0.12217    | 1.1699                                    |
| 0                  | -0.01794    | 1.06391                                   |
| 0                  | -0.05175    | -0.71235                                  |
| 0.2481             | -0.08291    | 1.44966                                   |
| 0.33441            | -0.00643    | 0.54859                                   |
| 0                  | 0.01419     | 0.51087                                   |
| 0                  | 0.02649     | 0.14783                                   |
| 0.29134            | 0.06428     | -0.59511                                  |

|         |          |          |
|---------|----------|----------|
| 0.11352 | -0.05382 | 1.59213  |
| 0       | -0.12446 | 0.40742  |
| 0.03776 | -0.11451 | -1.30162 |
| 0       | 0.07477  | 0.10652  |
| 0.01464 | 0.01149  | 0.9365   |
| 0.38731 | -0.1525  | 1.08169  |

Phylogenetically independent contrasts for changes in mechanical advantage ( $\Delta MA$ ) and body size ( $\Delta \text{Body sizes}$ ), with extinction (considered a continuous variable, but scored only for two end member states: extinction [1] or survival [0]) treated as the predictor variable. These values are derived from the dataset generated under a model of gradual trait change. Contrasts calculated using the CRUNCH algorithm as implemented in CAIC (Purvis and Rambaut 1995).

**Supporting table 8. Independent contrasts: CRUNCH algorithm applied to punctuated ‘raw’ (phylogenetically uncorrected) dataset.**

| ‘Extinction value’ | $\Delta$ MA | $\Delta$ Body size (ln[mm <sup>2</sup> ]) |
|--------------------|-------------|-------------------------------------------|
| 0                  | 0.01308     | -0.66413                                  |
| 0.5                | -0.02426    | -1.57143                                  |
| 0.5                | 0.08071     | 0.37592                                   |
| 0.24019            | -0.01246    | -0.36339                                  |
| 0.06934            | 0.0946      | 0.27659                                   |
| 0.5                | 0.01589     | -0.50031                                  |
| 0.53452            | -0.01066    | -0.39436                                  |
| 0                  | 0.02261     | -0.1693                                   |
| 0.16667            | -0.04327    | 1.53536                                   |
| 0.53452            | -0.0404     | 0.17473                                   |
| 0                  | 0.02811     | -0.46497                                  |
| 0.17588            | 0.01731     | -0.06086                                  |
| 0.44491            | 0.00839     | 1.09812                                   |
| 0.5                | -0.02378    | -0.22719                                  |
| 0.04714            | 0.02947     | 0.50162                                   |
| 0.5                | 0.04537     | -2.1009                                   |
| 0.20059            | 0.00728     | -0.19907                                  |
| 0.5                | -0.09636    | -1.25134                                  |
| 0                  | -0.01668    | 0.54272                                   |
| 0.16987            | -0.04567    | 1.15278                                   |
| 0                  | 0.02432     | -0.04684                                  |
| 0.46468            | -0.10128    | 1.36005                                   |
| 0.45262            | -0.0695     | 0.99802                                   |
| 0.23236            | 0.10089     | 1.34443                                   |
| 0.14105            | -0.00286    | 0.88505                                   |
| 0.5                | -0.22426    | -1.61929                                  |
| 0.16667            | -0.03135    | -0.64265                                  |
| 0.15318            | 0.02039     | -0.06182                                  |
| 0.03599            | 0.0294      | -1.88734                                  |
| 0.15189            | 0.06798     | -0.54414                                  |
| 0.06758            | -0.00965    | 1.09663                                   |
| 0.24625            | 0.03779     | -0.5237                                   |
| 0.51093            | -0.27031    | 1.62785                                   |
| 0                  | 0.06843     | -0.90647                                  |
| 0.05026            | -0.10228    | 1.34534                                   |
| 0                  | -0.02907    | 0.71052                                   |
| 0                  | -0.06375    | -0.64075                                  |
| 0.2481             | -0.09842    | 1.45668                                   |
| 0.33441            | 0.00249     | 0.52931                                   |
| 0                  | 0.12362     | -0.09536                                  |
| 0                  | 0.02649     | 0.14783                                   |
| 0.29134            | 0.06399     | -0.60414                                  |

|         |          |          |
|---------|----------|----------|
| 0.11352 | -0.05393 | 1.58861  |
| 0       | 0.00866  | -0.01426 |
| 0.03776 | -0.11455 | -1.30279 |
| 0       | -0.004   | 0.16507  |
| 0.01464 | 0.01148  | 0.93605  |
| 0.38731 | -0.12596 | 1.06213  |

Phylogenetically independent contrasts for changes in mechanical advantage ( $\Delta MA$ ) and body size ( $\Delta \text{Body sizes}$ ), with extinction (considered a continuous variable, but scored only for two end member states: extinction [1] or survival [0]) treated as the predictor variable. These values are derived from the dataset generated under a model of punctuated trait change. Contrasts calculated using the CRUNCH algorithm as implemented in CAIC (Purvis and Rambaut 1995).

## VII. Stratigraphic occurrences of extinction victims.

Below are listed references for stage-level stratigraphic occurrences of multistage extinction victims as shown in Supporting figures 2 and 3. Complete citations are found in the references section of this supplement.

†*Xiphactinus*: Bardack (1965); Gallagher *et al.* (1986); Gallagher (1993); Schwimmer *et al.* (1997); Carpenter (2003).

†*Pentanogmius*: Chalifa and Lewy (1992); Gallagher (2003); Taverne (2004).

†*Protosphyraena*: Dollo (1893); David (1946); Lambers (1992); Carpenter (2003).

†*Pachyrhizodus*: Forey (1977); Carpenter (2003).

†*Saurocephalus*: Bardack and Sprinkle (1969); Stewart (1999); Carpenter (2003).

†*Saurodon*: Bardack and Sprinkle (1969); Stewart (1999); Carpenter (2003).

†*Cimolichthys*: Goody (1969); Carpenter (2003); Ekrt *et al.* (2008).

†*Enchodus*: Goody (1969); McNulty and Kienzlen (1970); Carpenter (2003); Shimada (2006).

†*Apateodus*: Goody (1969); Carpenter (2003); Stewart and Hakel (2006).

†*Hoplopteryx*: Patterson (1964); Forey *et al.* (2003); Ekrt *et al.* (2008); pers. obs.

†*Apsopelix*: Dunkle (1960); Teller-Marshall and Bardack (1978).

†*Belonostomus*: Whetstone (1978); Brito (1997); Taverne (1998); Forey *et al.* (2003); Carpenter (2003).

†*Lissoberyx*: Patterson (1993a); Taverne (2003).

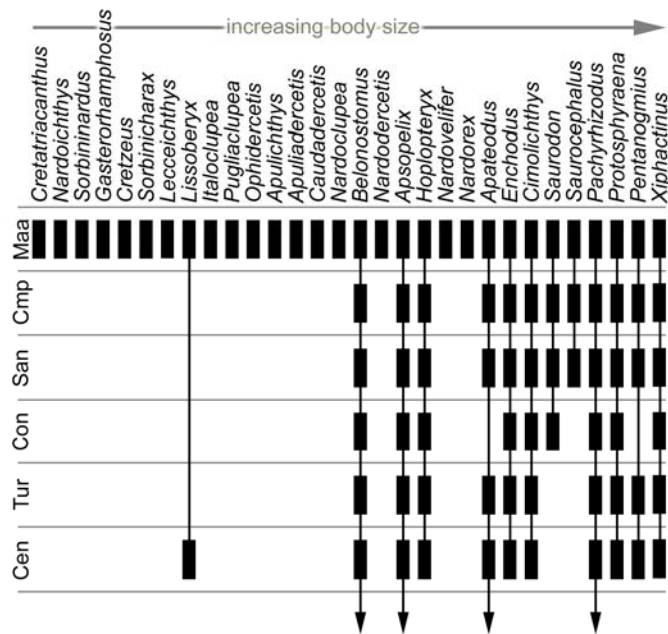

Supporting figure 2. Stratigraphic distribution of fossils assigned to genera making their last appearance in the Maastrichtian, sorted by body size (increasing from left to right; taxonomically uncertain Maastrichtian forms cf. †*Omosoma*, cf. †*Rhynchodercetus* and cf. †*Dercetis* are excluded). Solid blocks indicate that the genus is known from that stage. Arrows extending from bottom of figure indicate that the genus is recorded prior to the Cenomanian. The distribution of body sizes between genera occurring in more than one stage and that of singletons differ significantly (Kolmogorov-Smirnov test,  $p = 0.00017$ ; Mann-Whitney U-test,  $p = 2.0 \cdot 10^{-5}$ ). MA demonstrates the opposite trend (multistage victims have lower MA values than singletons); this pattern is also statistically significant (see main text and Supporting figures 3-4).

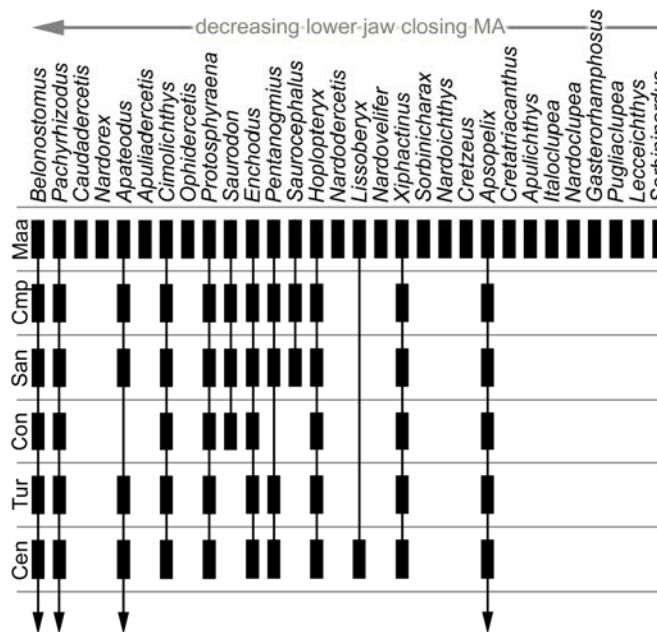

Supporting figure 3. Stratigraphic distribution of fossils assigned to genera making their last appearance in the Maastrichtian, sorted by jaw closing MA (decreasing from right to left; taxonomically uncertain Maastrichtian forms cf. †*Omosoma*, cf. †*Rhynchodercetes* and cf. †*Dercetes* are excluded). Solid blocks indicate that the genus is known from that stage. Arrows extending from bottom of figure indicate that the genus is recorded prior to the Cenomanian. The distribution of MA values between genera occurring in more than one stage and that of singletons differ significantly (Kolmogorov-Smirnov test,  $p = 0.010$ ; Mann-Whitney U-test,  $p = 0.0091$ ). Body size demonstrates the opposite trend (multistage victims are larger than than singletons); this pattern is also statistically significant (see main text and Supporting figures 2, 4).

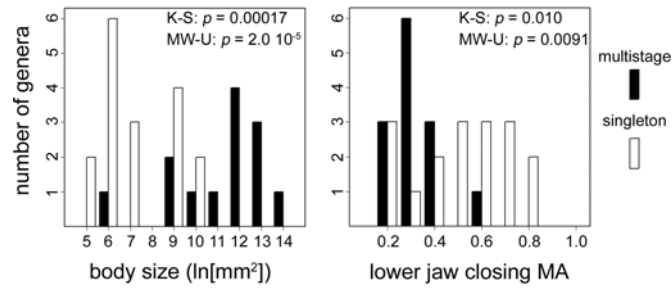

Supporting figure 4. Relationships between anatomical trait values (left, MA; right, body size) and stage-level distribution of fossil occurrences. Hollow bars indicate victims known only from a single stage, while those known from multiple stages are indicated by filled bars (taxonomically uncertain Maastrichtian forms cf. †*Omosoma*, cf. †*Rhynchodercetis* and cf. †*Dercetis* are excluded). For both traits, distributions of singletons and multistage victims differ significantly (body size: Kolmogorov-Smirnov test,  $p = 0.00017$ ; Mann-Whitney U-test,  $p = 2.0 \cdot 10^{-5}$ ; MA: Kolmogorov-Smirnov test,  $p = 0.010$ ; Mann-Whitney U-test,  $p = 0.0091$ ).



## IX. Dietary evidence for select extinction victims.

Supporting table 9. Preserved gut contents for select taxa making their last appearance in the final stage of the Cretaceous.

| Higher taxon         | Genus                                      | Stomach contents                                                                                                                   | Reference                                           |
|----------------------|--------------------------------------------|------------------------------------------------------------------------------------------------------------------------------------|-----------------------------------------------------|
| †Aspidorhynchidae    | † <b>Belonostomus</b> (J <sup>U</sup> )    | † <i>Homeosaurus</i> (sphenodontid);<br>† <i>Notagogus</i> (†macrosemiid)                                                          | Eastman (1911); de Saint Seine (1949); Viohl (1990) |
|                      | † <i>Aspidorhynchus</i> (J <sup>U</sup> )  | ? † <i>Anaethalion</i> (teleost);<br>† <i>Eichstaettia</i> (teleost);<br>† <i>Pholidophorus</i> (teleost);<br>indeterminate fishes | Viohl (1990)                                        |
| †Pachycormidae       | † <i>Asthenocormus</i> (J <sup>U</sup> )   | † <i>Tharsis</i> (teleost)                                                                                                         | Viohl (1990)                                        |
|                      | † <i>Hypsocormus</i> (J <sup>U</sup> )     | indeterminate fishes                                                                                                               | Viohl (1990)                                        |
| †Ichthyodectiformes  | † <i>Thrissops</i> (J <sup>U</sup> )       | † <i>Leptolepides</i> (teleost)                                                                                                    | Viohl (1990)                                        |
|                      | † <i>Allothrissops</i> (J <sup>U</sup> )   | † <i>Leptolepides</i> (teleost)                                                                                                    | Viohl (1990)                                        |
|                      | † <i>Eulibodectes</i> (K <sup>U</sup> )    | † <i>Gaudryella</i> (teleost);<br>† <i>Armigatus</i> (teleost)                                                                     | Forey <i>et al.</i> (2003)                          |
|                      | † <i>Cladocyclus</i> (K <sub>L</sub> )     | † <i>Rhacoelpis</i> (teleost)                                                                                                      | Patterson and Rosen (1977); Maisey (1994)           |
|                      | † <i>Xiphactinus</i> (K <sup>U</sup> )     | † <i>Gillicus</i> (teleost);<br>†Tselfatiiformes (teleost)                                                                         | Bardack (1965); Viohl (1990); Everhart (2005)       |
| †Pachyrhizodontoidei | † <i>Rhacolepis</i> (K <sub>L</sub> )      | † <i>Rhacolepis</i> (teleost);<br>† <i>Santanichthys</i> (teleost);<br>cf. † <i>Dastilbe</i> (teleost)                             | Wilby and Martill (1992); Maisey (1994)             |
|                      | † <i>Goulimimichthys</i> (K <sup>U</sup> ) | † <i>Enchodus</i> (teleost)                                                                                                        | Cavin (1999)                                        |
| †Alepisauroides      | † <b>Enchodus</b> (K <sup>U</sup> )        | indeterminate fishes;<br>†Enchodontidae (teleost)                                                                                  | Viohl (1990); Gayet <i>et al.</i> (2003)            |
|                      | † <i>Eurypholis</i> (K <sup>U</sup> )      | indeterminate fishes                                                                                                               | Viohl (1990); Gayet <i>et al.</i> (2003)            |
|                      | † <i>Cimolichthys</i> (K <sup>U</sup> )    | † <i>Tusoteuthis</i> (squid);<br>† <i>Enchodus</i> (teleost)                                                                       | Kauffman (1990); Everhart (2005)                    |

Stomach contents of extinction victims and their immediate relatives. Victims considered here are limited to those that fall outside the envelope of survivors in all data partitions (see Figure 2 in the main text). Ages of specific fossils with stomach contents are given in parentheses (J<sup>U</sup>: Upper Jurassic; K<sub>L</sub>: Lower Cretaceous; K<sup>U</sup>: Upper Cretaceous); genera making their last appearance in the Maastrichtian appear in boldface. Victims for which direct evidence of diet is unknown but have close relatives with preserved stomach contents include: †*Protosphyraena* (†Pachycormidae); †*Saurodon* (†Ichthyodectiformes); †*Saurocephalus* (†Ichthyodectiformes); †*Pachyrhizodus* (†Pachyrhizodontoidei).

## IX. References.

- Alvarado-Ortega J (2004) Description and relationships of a new ichthyodectiform fish from the Tlayúa Formation (Early Cretaceous: Albian), Puebla, Mexico. *Journal of Vertebrate Paleontology* 24:802-813.
- Alvarado-Ortega J, González-Rodríguez, Blanco-Piñón A, Espinosa-Arrubarrena L, Ovalles-Damián E. (2006) Mesozoic osteichthyans of Mexico. *Studies on Mexican paleontology*, eds Vega FJ, Nyborg TG, Perrilliat MC, Montellano-Ballesteros M, Cevallos-Ferriz SRS, Quiroz-Barroso SA (Springer, Dordrecht, the Netherlands), pp. 169-207.
- Alvarado-Ortega J, Ovalles-Damián E (2008) *Triplomystus applegatei* sp. nov. (Teleostei: Ellimmichthyiformes), a rare “triple armored herring” from el Espinal Quarry (Early Cretaceous), Chiapas, southeastern Mexico. *Journal of Vertebrate Paleontology* 28: 53-60.
- Anderson ME (1998) A Late Cretaceous (Maastrichtian) galaxiid fish from South Africa. *Special Publication, J. L. B. Smith Institute of Ichthyology* 60: 1-8.
- Applegate SP (1970) The vertebrate fauna of the Selma Formation of Alabama. Part VIII. The fishes. *Fieldiana: Geology Memoirs* 3: 385-433.
- Arambourg C (1967) Résultats scientifiques de la mission C. Arambourg en Syrie et en Iran (1938-1939). II. Les poissons Oligocènes de l’Iran. *Notes et Mémoires sur le Moyen-Orient* 8: 11-210.
- Arratia G (1997) Basal teleosts and teleostean phylogeny. *Palaeo-Ichthyologica* 7: 5-168.

- Baciu D-S, Bannikov AF, Tyler JC (2005) Revision of fossil fishes of the family Zeidae (Zeiformes). *Bolletino del Museo Civico di Storia Naturale di Verona, Geologia Paleontologia Preistoria* 29: 95-128.
- Baldwin CC, Johnson GD (1996) Interrelationships of Aulopiformes. *Interrelationships of fishes*, eds Stiassny MLJ, Parenti LR, Johnson GD (Academic Press, San Diego) pp 355-404.
- Bannikov A, Bacchia F (2000) A remarkable clupeomorph fish (Pisces, Teleostei) from a new Upper Cretaceous marine locality in Lebanon. *Senckenbergiana Lethaea* 80: 3-11.
- Bannikov AF, Parin NN (1997) The list of marine fishes from Cenozoic (Upper Paleocene-Middle Miocene) localities in southern European Russia and adjacent countries. *Journal of Ichthyology* 37: 149-161.
- Bardack D (1965) Anatomy and evolution of chirocentrid fishes. *University of Kansas Paleontological Contributions* 10: 1-88.
- Bardack D, Sprinkle G (1969) Morphology and relationships of saurocephalid fishes. *Fieldiana: Geology* 16: 297-340.
- Bartholomai A (2004) The large aspidorhynchid fish, *Richmondichthys sweeti* (Etheridge Jnr and Smith Woodward, 1891) from Albian marine deposits of Queensland, Australia. *Memoirs of the Queensland Museum* 49:521-536.
- Belouze A (2002) Compréhension morphologique et phylogénétique des taxons actuels et fossiles rapportés aux Anguilliformes («poissons», téléostéens). *Documents des Laboratoires de Géologie de Lyon* 158: 3-401.

- Belouze A, Gayet M, Atallah C (2003) Les premiers Anguilliformes : II. Paraphylie du genre *Urenchelys* WOODWARD 1900 et relations phylogénétiques. *Geobios* 36: 351-378.
- Bonde N (1997) A distinctive fish fauna in the basal ash-series of the Fur/Ølst Formation (Upper Paleocene, Denmark). *Aarhus Geoscience* 6: 33-48.
- Bonde N (2008) Osteoglossomorphs of the marine Lower Eocene of Denmark with remarks on other Eocene taxa and their importance for palaeobiogeography. *Geological Society, London, Special Publications* 295: 253-310.
- Bonde N, Anderson S, Hald N, Jakobsen SL (2008) Danekræ—Danmarks bedste fossiler (Glydendal Fakta, København).
- Brito PM (1997) Révision des Aspidorhynchidae (Pisces, Actinopterygii) du Mésozoïque : ostéologie, relations phylogénétiques, données environnementales et biogéographiques. *Geodiversitas* 19:681-772.
- Bryant LJ (1987) *Belonostomus* (Teleostei: Aspidorhynchidae) from the Late Paleocene of North Dakota. *Paleobios* 43: 1-3.
- Bryant LJ (1989) Non-dinosaurian lower vertebrates across the Cretaceous-Tertiary boundary in northeastern Montana. *University of California Publications, Geological Sciences* 134: 1-107.
- Carptenter K (2003) Vertebrate biostratigraphy of the Smoky Hill Chalk (Niobrara Formation) and the Sharon Springs Member (Pierre Shale). *Approaches in high-resolution stratigraphic paleontology*, ed. Harries PJ (Kluwer Academic Publishers, Amsterdam) pp. 421-437.

- Casier E (1966) *Faune ichthyologique du London Clay*. London: Trustees of the British Museum (Natural History), 496 pp.
- Cavin L (1999) Occurrence of a juvenile teleost, *Enchodus* sp., in a fish gut content from the Upper Cretaceous of Goulmima, Morocco. *Special Papers in Palaeontology* 60: 57-72.
- Cavin L (2001a) Effects of the Cretaceous-Tertiary boundary event on bony fishes. *Geological and biological effects of impact events*, eds Buffetaut E, Koeberl C (Springer Verlag, Berlin), pp. 141-158.
- Cavin L (2001b) Osteology and phylogenetic relationships of the teleost *Goulmimichthys arambourgi* Cavin, 1995, from the Upper Cretaceous of Goulmima, Morocco. *Eclogae geologicae Helvetiae* 94: 509-535.
- Cavin L, Grigorescu D (2005) A new *Crossognathus* (Actinopterygii, Teleostei) from the Lower Cretaceous of Romania with comments on Crossognathidae relationships. *Geodiversitas* 27: 5-16.
- Chang M-M, Grande L (1997) Redescription of †*Paraclupea chetungensis*, an early clupeomorph from the Lower Cretaceous of southeastern China. *Fieldiana: Geology* 37: 1-19.
- Chang M-M, Maisey JG (2003) Redescription of †*Ellimma branneri* and †*Diplomystus shengliensis*, and relationships of some basal clupeomorphs. *American Museum Novitates* 3404: 1-35.
- Cope ED (1871) On two extinct forms of Physostomi of the Neotropical region. *Proceedings of the American Philosophical Society* 12: 52-55.

- Corsi A, Landini W, Sorbini C (1999) A new ichthyofauna from the Upper Miocene of Ca' Matterella (Ravenna, Italy); paleoecological and paleobiogeographical considerations. *Studi e Ricerche sui Giacimenti Terziari di Bolca* 8: 59-76.
- David LR (1943) Miocene fishes of California. *Geological Society of America Special Paper* 43: 1-193.
- David LR (1946) Upper Cretaceous fish remains from the western border of the San Joaquin Valley, California. *Fossil Vertebrates from Western North America and Mexico. Carnegie Institute of Washington Publication* 551: 83-112.
- David LF (1948) Halosauridae from the California Tertiary. *Journal of Paleontology* 22: 94-100.
- Davis JW (1890) On the fossil fish of the Cretaceous formations of Scandinavia. *Scientific Transactions of the Royal Dublin Society*, 4, 363-434.
- Danil'chenko PG (1968) Ryby verkhnego paleostena Turkmenii. *Ocherki po filagenii i sistematike iskopor emykh ryb i bescheliustnykh*, ed. Obruchev DV (Nauka, Moscow) pp. 113-156.
- Dunkle DH (1960) Three North American Cretaceous fishes. *Proceedings of the United States National Museum* 108: 269-277.
- Eastman CR (1911) Jurassic saurian remains ingested within fish. *Annals of Carnegie Museum* 8: 182-187.
- Ebeling AW (1962) *Scopelogadus* (?) *capistranensis*, a new fossil melamphid (Pisces: Teleostei) from Capistrano Beach, California. *Postilla* 71: 1-6.

- Ekrt B, Koš'ák, Mazuch M, Voigt S, Wiese F (2008) New records of teleosts from the Late Turonian (Late Cretaceous) of the Bohemian Cretaceous Basin (Czech Republic). *Cretaceous Research* 29: 659-673.
- Everhart MJ (2005) Oceans of Kansas: a natural history of the Western Interior Sea (Indiana University Press, Bloomington).
- D'Erasmus G (1924) Ittioliti miocenici di Rosignano-Piemonte e di Vignale. *Ufficio geologico; Memoire per servire alla descrizione della carta geologica d'Italia* 9: 1-43.
- Fielitz C (2004) The phylogenetic relationships of the †Enchodontidae (Teleostei: Aulopiformes). *Recent advances in the origin and early radiation of vertebrates*, eds Arratia G, Wilson MVH, Cloutier R (München, Verlag Dr. Friedrich Pfeil), pp. 619-634.
- Fielitz C, Bardack D (1992) *Deltaichthys*, a new and unusually preserved albulid (Teleostei) probably from the Cretaceous of Texas. *Journal of Vertebrate Paleontology* 12: 133-141.
- Filleul A (2000) *Baugeichthys caeruleus*, gen. et sp. nov., a new albuliform fish from the Hauterivian of the Massif des Bauges (France). *Journal of Vertebrate Paleontology* 20: 637-644.
- Fink SV, Fink WL (1996) Interrelationships of ostariophysan fishes (Teleostei). *Interrelationships of fishes*, eds Stiassny MLJ, Parenti LR, Johnson GD (Academic Press, San Diego), pp 209-249.
- Forey PL (1973) A revision of elopiform fishes, fossil and Recent. *Bulletin of the British Museum (Natural History), Geology, Supplement* 10: 1-222.

- Forey PL (1977) The osteology of *Notelops* Woodward, *Rhacolepis* Agassiz and *Pachyrizodus* Dixon (Pisces: Teleostei). *Bulletin of the British Museum (Natural History) Geology* 28: 123-204.
- Forey PL, Littlewood DTJ, Richie P, Meyer A (1996) Interrelationships of elopomorph fishes. *Interrelationships of fishes*, ed. Stiassny MLJ, Parenti LR, Johnson GD (Academic Press, San Diego), pp 175-191.
- Forey PL, Patterson C (2006) Description and systematic relationships of †*Tomognathus*, an enigmatic fish from the English Chalk. *Journal of Systematic Palaeontology* 4: 157-184.
- Forey PL, Yi L, Patterson C, Davies C (2003) Fossil fishes from the Cenomanian (Upper Cretaceous) of Namoura, Lebanon. *Journal of Systematic Palaeontology* 1: 227-330.
- Frickhinger KA (1995) Fossil atlas: fishes (Mergus, Melle, Germany).
- Gallagher WB (1993) The Cretaceous/Tertiary mass extinction event in the northern Atlantic coastal plain. *The Mosasaur* 5: 75-154.
- Gallagher WB (2003) Oligotrophic oceans and minimalist organisms: collapse of the Maastrichtian marine ecosystem and Paleocene recovery in the Cretaceous-Tertiary sequence of New Jersey. *Netherlands Journal of Geosciences* 82: 225-231.
- Gallagher WB, Parris DC, Spamer EE (1986) Paleontology, biostratigraphy, and depositional environments of the Cretaceous-Tertiary transition in the New Jersey coastal plain. *The Mosasaur* 3: 1-35.



- Gallo-da-Silva, V, de Figueiredo, FJ (1999) *Pelotius hesselae*, gen. et sp. nov. (Teleostei: Holocentridae) from the Cretaceous (Turonian) of Pelotas Basin, Brazil. *Journal of Vertebrate Paleontology* 19: 263-270.
- Gardiner BG, Maisey JG, Littlewood DTJ (1996) Interrelationships of basal neopterygians. *Interrelationships of fishes*, eds Stiassny MLJ, Parenti LR, Johnson, GD (Academic Press, San Diego), pp 117-146.
- Gaudant M (1978) Contribution à un révision des poissons crétacés du Jbel Tselfat (Rides pré-rifaines, Maroc). Notes du Service géologique, Maroc 272: 79-124.
- Gayet M (1980) Contribution à l'étude anatomique et systématique des poissons cénomaniens du Liban, anciennement placés dans les acanthoptérygiens. *Mémoires du Muséum national d'Histoire naturelle* 44: 1-149.
- Gayet M (1982) Essai de définition des relations phylogénétiques des Holocentroidea nov. et des Trachichthyoidea nov. (Pisces, Acanthopterygii, Béréciformes). *Bulletin du Muséum national d'Histoire naturelle, Paris* (4) 4C: 21-41.
- Gayet M (1985a) Gonorhynchiforme nouveau du Cénomaniens inférieur marin de Ramallah (Monts de Judée): *Judeichthys haasi* nov. gen. nov. sp. (Teleostei, Ostariophysi, Judeichthyidae nov. fam). *Bulletin du Muséum national d'Histoire naturelle C* (4) 7: 65-85.
- Gayet M (1985b) Rôle de l'évolution de l'appareil de Weber dans la phylogénie dans la phylogénie des Ostariophysi suggéré par un nouveau Characiforme du Cénomaniens supérieur Marin du Portugal. *Compte-Rendus des Séances de l'Académie des Sciences de Paris, série II* 300: 895-898.

- Gayet M (1986) *Ramallichthys* Gayet du Cénomanién inférieur marin de Ramallah (Judée), un introduction aux relations phylogénétiques des Ostariophysi. *Memoire du Muséum national d'Histoire naturelle C 51*: 1-81.
- Gayet M (1993) Gonorhynchoidei du Crétacé supérieur marin du Liban et relations phylogénétiques des Charitosomidae nov. fam. *Documents des laboratoires de géologie Lyon 126*: 1-131.
- Gayet M, Meunier FJ (1998) Maastrichtian to early Late Paleocene freshwater Osteichthyes of Bolivia: additions and comments. *Phylogeny and classification of neotropical fishes*, eds Malabara LR, Reis RE, Vari RP, Lucena ZMS, Lucena CAS (EDIPUCRS, Porto Alegre), pp 85-100.
- Goody PC (1968) The relationships of certain Upper Cretaceous teleosts with special reference to the myctophoids. *Bulletin of the British Museum (Natural History): Geology supplement 7*: 1-255.
- Goody PC (1970) The Cretaceous teleostean fish *Cimolichthys* from the Niobrara Formation of Kansas and the Pierre Shale of Wyoming. *American Museum Novitates 2434*: 1-29.
- Gradstein F, Ogg J, Smith A (2004) *A geologic time scale 2004* (Cambridge University Press, Cambridge).
- Grande L (1982) A revision of the fossil genus †*Diplomystus*, with comments on the interrelationships of clupeomorph fishes. *American Museum Novitates 2728*: 1-34.

- Grande L (1985) Recent and fossil clupeomorph fishes with materials for revision of the subgroups of clupeoids. *Bulletin of the American Museum of Natural History* 181: 231-372.
- Grande L, Chatterjee S (1987) New Cretaceous fish fossils from Seymour Island, Antarctic peninsula. *Palaeontology* 30: 829-837.
- Grande L, Grande T (1999) A new species of †*Notogoneus* (Teleostei: Gonorhynchidae) from the Upper Cretaceous Two Medicine Formation of Montana, and the poor Cretaceous record of freshwater fishes from North America. *Journal of Vertebrate Paleontology* 19: 612-622.
- Gregory WK, Conrad GM (1936) Pictorial phylogenies of the deep sea Isospondyli and Iniomi. *Copeia* 1936: 21-36.
- Hurley IA, Lockridge Mueller R, Dunn KA, Schmidt EJ, Friedman M, Ho RK, Prince VE, Yang Z, Thomas MG, Coates MI (2008) A new time-scale for ray-finned fish evolution. *Proceedings of the Royal Society, Series B* 274: 489-498.
- Inoue JG, Miya M, Tsukamoto K, Nishida M (2004) Mitogenomic evidence for the monophyly of elopomorph fishes (Teleostei) and the evolutionary origin of the leptocephalus larva. *Molecular Phylogenetics and Evolution* 32: 274-286.
- Ishiguro NB, Miya M, Nishida M (2003) Basal euteleostean relationships: a mitogenomic perspective on the phylogenetic reality of “Protoacanthopterygii”. *Molecular Phylogenetics and Evolution* 27: 476-488.
- Johnson GD (1992) Monophyly of the Euteleostean clades—Neoteleostei, Eurypterygii, and Ctenosquamata. *Copeia* 1992: 8-25.

- Johnson GD, Patterson C (1993) Percomorph phylogeny: a survey and a new proposal. *Bulletin of Marine Science* 52: 554-626.
- Johnson GD, Patterson C (1996) Relationships of lower euteleostean fishes. *Interrelationships of fishes*, eds Stiassny MLJ, Parenti LR, Johnson GD (Academic Press, San Diego), pp 251-332.
- Kawahara R, Miya M, Mabuchi K, Lavoué, Inoue JG, Satoh TP, Kawaguchi A, Nishida M (2008) Interrelationships of the 11 gasterosteiform families (sticklebacks, pipefishes, and their relatives): a new perspective based on whole mitogenome sequences from 75 higher teleosts. *Molecular Phylogenetics and Evolution* 46: 224-236.
- Keivany Y, Nelson JS (2006) Interrelationships of Gasterosteiformes (Actinopterygii, Percomorpha). *Journal of Ichthyology* 46 (supplement): S84-S96.
- Kruzinga P (1924) *Apateodus corneti* (For.) in the Senonian beds of the southern part of Limburg (Netherlands). *Koninklijke Nederlandse Akademie van Wetenschappen, Proceedings of the Section of Sciences* 27: 293-312.
- Lambers P (1992) On the ichthyofauna of the Solnhofen lithographic limestone (Upper Jurassic, Germany). Unpublished PhD Thesis, Rijksuniversiteit Groningen, 336 pp.
- Landman NH, Johnson RO, Edwards LE (2004) Cephalopods from the Cretaceous/Tertiary boundary interval on the Atlantic Coastal Plain, with a description of the highest ammonite zones in North America. Part 2. Northeastern Monmouth County, New Jersey. *Bulletin of the American Museum of Natural History* 287: 1-107.

- Lavoué S, Miya M, Saitoh K, Ishiguro NB, Nishida M (2007) Phylogenetic relationships among anchovies, sardines, herrings and their relatives (Clupeiformes), inferred from whole mitogenome sequences. *Molecular Phylogenetics and Evolution*. 43: 1096-1105.
- Lecointre G, Nelson G (1996) Clupeomorpha, sister-group of Ostariophysii. *Interrelationships of fishes*, eds Stiassny MLJ, Parenti LR, Johnson GD (Academic Press, San Diego), pp 193-249.
- Lee DE, McDowall RM, Lindqvist JK (2007) *Galaxias* fossils from Miocene lake deposits, Otago, New Zealand: earliest records of the Southern Hemisphere family Galaxiidae (Teleostei). *Journal of the Royal Society of New Zealand* 37: 109-130.
- Leonardi A (1966) L'Ittiofauna Cenomania di Floresta-Messina. *Palaeontographica Italica* 60:33-67.
- Maisey JG (1994) Predator-prey relationships and trophic-level reconstruction in a fossil fish community. *Environmental Biology of Fishes* 40: 1-22.
- Maisey JG (1996) *Discovering Fossil Fishes* (Henry Holt and Company, New York).
- McNulty CL, Kienzlen G (1970) An enchodontid mandible from the Eagle Ford Shale (Turonian), Dallas County, Texas. *The Texas Journal of Science* 21: 447-453.
- Merrett NR, Moore JA. 2005. A new genus and species of deep demersal fish (Teleostei: Stephanoberycidae) from the tropical eastern North Atlantic. *Journal of Fish Biology* 67: 1699-1710.
- Miya M, Takeshima H, Endo H, Ishiguro NB, Inoue JG, Mukai T, Satoh TP, Yamaguchi M, Kawaguchi A, Mabuchi K, Shirai SM, Nishida M (2003) Major patterns of

- higher teleostean phylogenies: a new perspective based on 100 complete mitochondrial DNA sequences. *Molecular Phylogenetics and Evolution* 26: 121-138.
- Moore JA (1993a) The phylogeny and evolution of the Trachichthyiformes (Teleostei: Percomorpha), with comments on the intrarelationships of the Acanthomorpha. Unpublished PhD thesis, Yale University, 271 pp.
- Moore JA (1993b) Phylogeny of the Trachichthyiformes (Teleostei: Percomorpha). *Bulletin of Marine Science* 52: 114-136.
- Nursall JR (1996) The phylogeny of pycnodont fishes. *Mesozoic fishes—systematics and paleoecology*, eds Arratia G, Viohl G (Verlag Dr. Friedrich Pfeil, München), pp 125-152.
- Orr JW (1995) Phylogenetic relationships of gasterosteiform fishes (Teleostei: Acanthomorpha). Unpublished PhD thesis, University of Washington, 813 pp.
- Otero O, Dutour Y, Gayet M (1995) *Hgulichthys*, nouveau genre de Lissoberycinae (Trachichthyiformes, Trachichthyoidea) du Cénomaniens inférieur marin de Hgula (Liban). Implications phylogénétiques. *Geobios* 28: 711-717.
- Parris DC, Smith Grandstaff B, Gallagher WB (2007) Fossil fish from the Pierre Shale Group (Late Cretaceous): clarifying the biostratigraphic record. *Geological Society of America Special Paper* 427: 99-109.
- Patterson C (1964) A review of Mesozoic acanthopterygian fishes, with special reference to those of the English Chalk. *Philosophical Transactions of the Royal Society of London, Series B*, 247: 213-482.
- Patterson C (1967) New Cretaceous berycoid fishes from the Lebanon. *Bulletin of the British Museum (Natural History): Geology* 14: 67-110.

- Patterson C (1970) Two Upper Cretaceous salmoniform fishes from the Lebanon. *Bulletin of the British Museum (Natural History): Geology* 19: 207-296.
- Patterson C (1977) The contribution of paleontology to teleostean phylogeny. *Major patterns in vertebrate evolution*, eds Hecht MK, Goody PC, Hecht BM (Plenum Press, New York), pp 579-643.
- Patterson C (1984) *Chanoides*, a marine Eocene otophysan fish (Teleostei: Ostariophysi). *Journal of Vertebrate Paleontology* 4: 430-456.
- Patterson C (1993a) An overview of the early fossil record of acanthomorphs. *Bulletin of Marine Science* 52: 29-59.
- Patterson C (1993b) Osteichthyes: Teleostei. *The fossil record 2*, ed. Benton M (Chapman and Hall, London), pp. 621-656.
- Patterson C, Rosen DE (1977) Review of ichthyodectiform and other Mesozoic teleost fishes and the theory and practice of classifying fossils. *Bulletin of the American Museum of Natural History* 158: 81-172.
- Paxton JR, Johnson GD, Trnski T (2001) Larvae and juveniles of the deepsea “whalefishes” *Barbourisia* and *Rondeletia* (Stephanoberyciformes: Barbourisiidae, Rondeletiidae). *Records of the Western Australian Museum* 53: 407-425.
- Piestch TW (1978) Evolutionary relationships of the sea moths (Teleostei: Pegasidae) with a classification of gasterosteiform families. *Copeia* 1978: 517-529.
- Poyato-Ariza FJ (1995) *Ichthyemidion*, a new genus for the elopiform fish “*Anaethalion*” *vidali*, from the Early Cretaceous of Spain: phylogenetic comments. *Comptes rendus de l'Académie des sciences, Paris, série II a* 320: 133-139.

- Purvis A, Rambaut A (1995) Comparative analysis by independent contrasts (CAIC): an Apple Macintosh application for analyzing comparative data. *Computer Applications in the Biosciences* 11:247-251.
- Radovčić K (1975) Some new Upper Cretaceous teleosts from Yugoslavia with special reference to localities, geology and palaeoenvironment. *Palaeontologia Jugoslavica* 17: 1-55.
- Regan CT (1911) The anatomy and classification of the teleostean fishes of the Order Iniomi. *Annals and Magazine of Natural History* (9) 15: 53-59.
- Robins CR (1989) The phylogenetic relationships of the anguilliform fishes. In *Fishes of the Western North Atlantic*, pt. 9, vol. 1 (ed. Böhlke EB), pp. 9-29. New Haven: Yale University Press.
- Rosen DE (1973) Interrelationships of higher euteleostean fishes. *Interrelationships of fishes*, eds Greenwood PH, Miles RS, Patterson C (Academic Press, London), pp. 397-513.
- Russell DA (1988) A check list of North American marine Cretaceous vertebrates including fresh water fishes. *Occasional Paper of the Royal Tyrrell Museum of Palaeontology* 4: 1-58.
- de Saint-Seine R (1949) Les poisons des calcaires lithographiques de Cerin (Ain). *Nouvelles Archives du Muséum d'Histoire naturelle de Lyon* 2: 1-357.
- Schwimmer DR, Stewart JD, Williams GD (1997) *Xiphactinus vestus* and the distribution of *Xiphactinus* species in the eastern United States. *Journal of Vertebrate Paleontology* 17: 610-615.



- Smith WL, Wheeler WC (2006) Venom evolution widespread in fishes: a phylogenetic roadmap for the bioprospecting of piscine venoms. *Journal of Heredity* 97: 206-217.
- Sorbini C, Sorbini L (1999) The Cretaceous fishes of Nardò. 10°. *Nardovelifer altipinnis*, gen. nov. et sp. nov. (Teleostei, Lampridiformes, Veliferidae). *Studi e Ricerche sui Giacimenti Terziari di Bolca, Miscellanea Paleontologica, Museo Civico di Storia Naturale, Verona* 8: 11-27.
- Sorbini L (1976) L'Ittiofauna Cretacea di Cinto-Euganeo. *Bolletino del Museo Civico di Storia Naturale, Verona* 3: 469-567.
- Sorbini L, Tirapelle R (1975) Gli Holocentridae di Monte Bolca. 1: *Eoholocentrum macrocephalum* (de Blainville)(Pisces-Actinopterygii). *Studi e Ricerche sui Giacimenti Terziari di Bolca, Miscellanea Paleontologica, Museo Civico di Storia Naturale, Verona* 2: 205-228.
- Stewart JD (1984) Taxonomy, paleoecology, and stratigraphy of the halecostome-inoceramid associations of the North American Upper Cretaceous epicontinental seaways. Unpublished PhD thesis, University of Kansas, Lawrence, 201 pp.
- Stewart JD (1988) The stratigraphic distribution of Late Cretaceous *Protosphyraena* in Kansas and Alabama. *Fort Hays Studies* 3: 80-94.
- Stewart JD (1999) A new genus of Saurodontidae (Teleostei: †Ichthyodectiformes) from Upper Cretaceous rocks of the Western Interior of North America. In *Mesozoic fishes 2—systematics and fossil record* (eds Arratia G, Schultze H-P), pp. 335-360. München: Verlag Dr. Friedrich Pfeil.

- Stewart JD, Hakel M (2006) Ichthyofauna of the Mowry Shale (early Cenomanian) of Wyoming. *New Mexico Museum of Natural History and Science Bulletin* 35: 161-164.
- Stiassny MLJ, Moore JA (1992) A review of the pelvic girdle of acanthomorph fishes, with comments on hypotheses of acanthomorph intrarelationships. *Zoological Journal of the Linnean Society* 104: 209-242.
- Stiassny MLJ (1996) Basal ctenosquamate relationships and the interrelationships of the myctophiform (scopelomorph) fishes. *Interrelationships of fishes*, eds Stiassny MJL, Parenti LR, Johnson GD (Academic Press, San Diego), pp. 579-405-426.
- Suarez ME (2001) Fossil fish faunas from the Quiriquina Formation, Late Cretaceous (Maastrichtian) of Chile, South America. *III International Meeting on Mesozoic Fishes, Systematics, Paleoenvironments and Biodiversity*, ed. A Tintori (UNIMI, Serpiano-Monte San Giorgio), pp 59.
- Taverne L (1980) Ostéologie et position systématique du genre *Platinx* (Pisces, Teleostei) de l'éocène du Monte Bolca (Italie). Académie Royale de Belgique, Bulletin de la Classe des Sciences, 5<sup>e</sup> série 66: 873-889.
- Taverne L (1991) Révision de *Protostomias*, téléostéen stomiiforme du Crétacé de la Mésogée Eurafrique. *Biologisch Jaarboek Dodonaea* 59: 57-76.
- Taverne L (1992) Révision de *Kermichthys daguini* (Arambourg, 1954) nov. gen., téléostéen salmoniforme du Crétacé de la Mésogée Eurafrique. *Biologisch Jaarboek Dodonaea* 60: 76-95.

- Taverne L (1993) Ostéologie et affinités du téléostéen crétacique *Elopopsis microdon* (Pisces, Crossognathiformes, Pachyrhizodontidae). *Biologisch Jaarboek Dodonaea* 61: 172-192.
- Taverne L (1994) Révision de *Paravinciguerrria praecursor* Arambourg, 1954, téléostéen salmoniforme du Crétacé de la Mésogée Eurafrique. *Biologisch Jaarboek Dodonaea* 62: 56-69.
- Taverne L (1995) Révision de *Tingitanichthys heterodon* (Arambourg, 1954) nov. gen. (Teleostei, Pachyrhizodontoidei) du Crétacé supérieur marin du Maroc. *Biologisch Jaarboek Dodonaea* 63: 133-151.
- Taverne L (1997) Les poissons crétacés de Nardò. 4°. *Apulichthys gayeti* gen. nov., sp. nov. (Teleostei, Ostariophysi, Gonorhynchiformes). *Bolletino del Museo Civico di Storia Naturale di Verona* 21: 401-436
- Taverne L (1998a) Les ostéoglossomorphes marins de l'Éocène du Monte Bolca (Italie): *Monopteros* Volta, 1796, *Thrissopterus* Heckel, 1856 et *Foreyichthys* Taverne, 1979. Considérations sur la phylogénie des téléostéens ostéoglossomorphes. *Studi e Ricerche sui Giacimenti Terziari di Bolca* 7: 67-158.
- Taverne L (1998b) Les poissons crétacés de Nardò. 6°. *Belonostomus* sp. (Aspidorhynchidae) et considérations sur les relations entre Aspidorhynchiformes et les téléostéens (Pisces, Actinopterygii). *Bolletino del Museo Civico di Storia Naturale di Verona* 22: 275-290.
- Taverne L (1998c) Les poissons crétacés de Nardò. 7°. *Lecceichthys wautyi* gen. nov., sp. nov. (Teleostei, Ostariophysi, Gonorhynchiformes) et considérations sur la

- phylogénie des Gonorhynchidae. *Bolletino del Museo Civico di Storia Naturale di Verona* 22: 291-316.
- Taverne L (1999a) Les poissons créacés de Nardò. 8°. *Sorbininardus apuliensis*, gen. nov., sp. nov. (Teleostei, Ostariophysii, Anotoptysi, Sorbininardiformes, nov. ord.) *Bolletino del Museo Civico di Storia Naturale di Verona* 22: 275-290.
- Taverne, L (1999b) Ostéologie et position systématique d'*Arratiaelops vectensis* gen. nov., téléostéen élopifrome du Wealdien (Crétacé inférieur) d'Angleterre et de Belgique. *Bulletin de l'Institut Royal des Sciences Naturelles de Belgique, Sciences de la Terre* 69: 77-96.
- Taverne L (2000a) Ostéologie et position systématique du genre *Plethodus* et des nouveaux genres *Dixonanogmius* et *Pentanogmius*, poissons marins du Crétacé (Teleostei, Tselfatiiformes). *Biologisch Jaarboek Dodonaea* 67: 94-123.
- Taverne L (2000b) *Tselfatia formosa*, téléostéen marin du Crétacé (Pisces, Actinopterygii), et la position systématique des Tselfatiiformes ou Bananogmiiformes. *Geodiversitas* 22: 5-22.
- Taverne L (2002a) Les poissons créacés de Nardò. 12°. *Nardoclupea grandei* gen. et sp. nov. (Teleostei, Clupeiformes, Dussumieriinae). *Bollettino del Museo Civico di Storia Naturale di Verona, Geologia Paleontologia Preistoria* 26: 3-23.
- Taverne L (2002b) Les poissons créacés de Nardò. 13°. *Nardoechelys robinsi* gen. et sp. nov., la plus ancienne anguille de type moderne connue par des éléments squelettiques (Teleostei, Anguilliformes, Ophichthidae). *Bollettino del Museo Civico di Storia Naturale di Verona, Geologia Paleontologia Preistoria* 26: 25-31.

- Taverne L (2003a) Les poissons crétacés de Nardò. 14°. *Lissoberyx pugliensis* sp. nov. (Teleostei, Beryciformes, Trachichthyidae). *Bollettino del Museo Civico di Storia Naturale di Verona, Geologia Paleontologia Preistoria* 27: 3-13.
- Taverne L (2003b) Les poissons crétacés de Nardò. 16°. *Sorbinicharax verraesi* gen. et sp. nov. (Teleostei, Ostariophysi, Characiformes). *Bollettino del Museo Civico di Storia Naturale di Verona, Geologia Paleontologia Preistoria* 27: 29-45.
- Taverne L (2004a) Ostéologie de *Pentanogmius evolutus* (Cope, 1877) n. comb. (Teleostei, Tselfatiiformes) du Crétacé supérieur marin des États-Unis. Remarques sur la systématique du genre *Pentanogmius* Taverne, 2000. *Geodiversitas* 26 : 89-113.
- Taverne L (2004b) Les poissons crétacés de Nardò. 17°. *Aspesaipichthys cavaensis* gen. et sp. nov. (Teleostei, Acanthomorpha, Aipichthyoidei). *Bollettino del Museo Civico di Storia Naturale di Verona, Geologia Paleontologia Preistoria* 28: 3-15.
- Taverne L (2004c) Les poissons crétacés de Nardò. 18°. *Pugliaclupea nolardi* gen. et sp. nov. (Teleostei, Clupeiformes, Clupeidae). *Bollettino del Museo Civico di Storia Naturale di Verona, Geologia Paleontologia Preistoria* 28: 17-28.
- Taverne L (2004d) Les poissons crétacés de Nardò. 19°. *Nardorex zorzoni* gen. et sp. nov. (Teleostei, Aulopiformes, Alepisauroidi). *Bollettino del Museo Civico di Storia Naturale di Verona, Geologia Paleontologia Preistoria* 28: 29-40.
- Taverne, L (2005a) Les poissons crétacés de Nardò. 20°. *Chanoides chardoni* sp. nov. (Teleostei, Ostariophysi, Otophysi). *Bollettino del Museo Civico di Storia Naturale di Verona, Geologia Paleontologia Preistoria* 29: 39-54.

- Taverne L (2005b) Les poissons crétacés de Nardò. 21°. *Ophidercetus italiensis* gen. et sp. nov. (Teleostei, Aulopiformes, Dercetidae). Une solution ostéologique au problème des genres *Dercetus* et *Benthesikyme* (= *Leptotrachelus*). *Bollettino del Museo Civico di Storia Naturale di Verona, Geologia Paleontologia Preistoria* 29: 55-79.
- Taverne L (2005b) Les poissons crétacés de Nardò. 22°. *Nardodercetus vandewallei* gen. et sp. nov. (Teleostei, Aulopiformes, Dercetidae). *Bollettino del Museo Civico di Storia Naturale di Verona, Geologia Paleontologia Preistoria* 29: 81-93.
- Taverne L (2006a) Les poissons crétacés de Nardò. 23°. *Apuliadercetus tyleri* gen. et sp. nov. (Teleostei, Aulopiformes, Dercetidae). *Bollettino del Museo Civico di Storia Naturale di Verona, Geologia Paleontologia Preistoria* 30: 11-26.
- Taverne L (2006b) Les poissons crétacés de Nardò. 24°. *Caudadercetus bannikovi* gen. et sp. nov. (Teleostei, Aulopiformes, Dercetidae). Considérations sur la phylogénie des Dercetidae. *Bollettino del Museo Civico di Storia Naturale di Verona, Geologia Paleontologia Preistoria* 30: 27-48.
- Taverne L (2007) Les poissons crétacés de Nardò. 25°. *Italoclupea nolfi* gen. et sp. nov. (Teleostei, Clupeidae). *Bollettino del Museo Civico di Storia Naturale di Verona, Geologia Paleontologia Preistoria* 31: 21-35.
- Tavene L, Bronzi P (1999) Les poissons crétacés de Nardò. 9°. Note complémentaire sur le Saurodontinae (Teleostei, Ichthyodectiformes): *Saurodon elongatus*, sp. nov. *Studi e Ricerche sui Giacimenti Terziari di Bolca, Miscellanea Paleontologica, Museo Civico di Storia Naturale, Verona* 8: 105-116.

- Taverne L, Filleul A (2003) Osteology and relationships of the genus *Spaniodon* (Teleostei, Salmoniformes) from the Santonian (Upper Cretaceous) of Lebanon. *Palaeontology* 46: 927-944.
- Taverne L, Gayet M (2004) Ostéologie et relations phylogénétiques des Protobramidae (Teleostei, Tselfatiiformes) du Cénomanién (Crétacé supérieur) du Liban. *Cybium* 28: 285-314.
- Taverne L, Gayet M (2005) Phylogenetical relationships and palaeozoogeography of the marien Cretaceous Tselfatiiformes (Teleostei, Clupeocephala). *Cybium* 29: 65-87.
- Tyler JC, Bronzi P, Ghiandoni A (2000) The Cretaceous fishes of Nardo 11°. A new genus and species of Zeiformes, *Cretazeus rinaldii*, the earliest record for the order. *Bollettino del Museo Civico di Storia Naturale di Verona, Geologia Paleontologia Preistoria* 24: 11–28.
- Tyler JC, O’Toole B, Winterbottom R (2003) Phylogeny of the genera and families of zeiform fishes, with comments on their relationships with tetraodontiforms and caproids. *Smithsonian Contributions to Zoology* 618: 1–110.
- Tyler JC, Santini F (2003) A phylogeny of the families of fossil and extant tetraodontiform fishes (Acanthomorpha, Tetraodontiformes), Upper Cretaceous to Recent. *Zoological Journal of the Linnean Society* 139: 565-617.
- Tyler JC, Santini F (2005) A phylogeny of the fossil and extant zeiform-like fishes, Upper Cretaceous to Recent, with comments on the putative zeomorph clade (Acanthomorpha). *Zoologica Scripta* 34: 157-175.

- Tyler JC, Sorbini L (1996) A new superfamily and three new families of tetraodontiform fishes from the Upper Cretaceous: the earliest and most morphologically primitive plectognaths. *Smithsonian Contributions to Paleobiology* 82: 1-59.
- Viohl G (1990) Piscivorous fishes of the Solnhofen lithographic limestone. *Evolutionary Paleobiology of Behavior and Coevolution*, ed. Boucot AJ (Elsevier, Amsterdam), pp 287-303.
- Weitzman SH (1967) The origin of the stomatioid fishes with comments on the classification of salmoniform fishes. *Copeia* 1967: 507-540.
- Wenz S. 1965. Les poissons albiens de Vallentigny (Aube). *Annales de Paléontologie (Vertébrés)* 49: 1-23.
- Westneat MW (2004) Evolution of levers and linkages in the feeding mechanisms of fishes. *Integrative and Comparative Biology* 44: 378-389.
- Whetstone KN (1978) *Belonostomus* sp. (Teleostei, Aspidorhynchidae) from the Upper Cretaceous Tombigbee sand of Alabama. *University of Kansas Paleontological Contributions* 89: 17-19.
- Wiffen J (1983) The first record of *Pachyrhizodus caninus* COPE (Order Clupeiformes) from the Late Cretaceous of New Zealand. *New Zealand Journal of Geology and Geophysics* 26: 109-119.
- Wilby PR, Martill DM (1992) Fossil fish stomachs: a microenvironment for exceptional preservation. *Historical Biology* 6: 25-36.
- Wilson MVH, Brinkman DB, Neuman AG (1992) Cretaceous Escocoidei (Teleostei): early radiation of the pikes in North American fresh waters. *Journal of Paleontology* 66: 839-846.



Woodward AS (1900) Evidence of an extinct eel (*Urenchelys anglicus*, sp. n.) from the English Chalk. *Annals and Magazine of Natural History* (7) 4: 317-321.

Woodward AS. 1901. Catalogue of Fossil Fishes in the British Museum (Natural History). Part 4 (British Museum (Natural History), London).
